# Supplementary material for: Neritinaceramides A–E, New Ceramides from the Marine Bryozoan Bugula neritina Inhabiting South China Sea and Their Cytotoxicity
Source: PubMed Central journal article supplement (PMC4012440; doi:10.3390/md12041987), 2014-04-02

## Supplementary Information

- Figure S1.** HR-ESI-MS (positive) spectrum of compound **1**.
- Figure S2.** ESI-MS (positive and negative) spectrum of compound **1**.
- Figure S3.** ESI-MS (positive and negative) fragments spectrum of compound **1**.
- Figure S4.**  $^1\text{H}$ -NMR spectrum of compound **1**.
- Figure S5.**  $^{13}\text{C}$ -NMR spectrum of compound **1**.
- Figure S6.** DEPT spectrum of compound **1**.
- Figure S7.** HSQC spectrum of compound **1**.
- Figure S8.** HMBC spectrum of compound **1**.
- Figure S9.**  $^1\text{H}$ - $^1\text{H}$  COSY spectrum of compound **1**.
- Figure S10.** NOESY spectrum of compound **1**.
- Figure S11.** EI-MS data of FAME **1**.
- Figure S12.** HR-ESI-MS (positive) spectrum of compound **2**.
- Figure S13.** ESI-MS (positive and negative) spectrum of compound **2**.
- Figure S14.** ESI-MS (positive and negative) fragments spectrum of compound **2**.
- Figure S15.**  $^1\text{H}$ -NMR spectrum of compound **2**.
- Figure S16.**  $^{13}\text{C}$ -NMR spectrum of compound **2**.
- Figure S17.** DEPT spectrum of compound **2**.
- Figure S18.** HSQC spectrum of compound **2**.
- Figure S19.** HMBC spectrum of compound **2**.
- Figure S20.**  $^1\text{H}$ - $^1\text{H}$  COSY spectrum of compound **2**.
- Figure S21.** NOESY spectrum of compound **2**.
- Figure S22.** EI-MS data of FAME **2**.
- Figure S23.** ESI-MS (positive and negative) spectrum of compound **3**.
- Figure S24.** ESI-MS (positive and negative) fragments spectrum of compound **3**.
- Figure S25.**  $^1\text{H}$ -NMR spectrum of compound **3**.
- Figure S26.**  $^{13}\text{C}$ -NMR spectrum of compound **3**.
- Figure S27.** DEPT spectrum of compound **3**.
- Figure S28.** EI-MS data of FAME **3**.
- Figure S29.** HR-ESI-MS (positive) spectrum of compound **4**.
- Figure S30.** ESI-MS (positive and negative) spectrum of compound **4**.
- Figure S31.** ESI-MS (positive and negative) fragments spectrum of compound **4**.
- Figure S32.**  $^1\text{H}$ -NMR spectrum of compound **4**.
- Figure S33.**  $^{13}\text{C}$ -NMR spectrum of compound **4**.
- Figure S34.** DEPT spectrum of compound **4**.
- Figure S35.** HR-ESI-MS (positive) spectrum of compound **5**.
- Figure S36.** ESI-MS (positive and negative) spectrum of compound **5**.
- Figure S37.** ESI-MS (positive and negative) fragments spectrum of compound **5**.
- Figure S38.**  $^1\text{H}$ -NMR spectrum of compound **5**.
- Figure S39.**  $^{13}\text{C}$ -NMR spectrum of compound **5**.
- Figure S40.** DEPT spectrum of compound **5**.

Figure S1. HR-ESI-MS (positive) spectrum of compound 1.

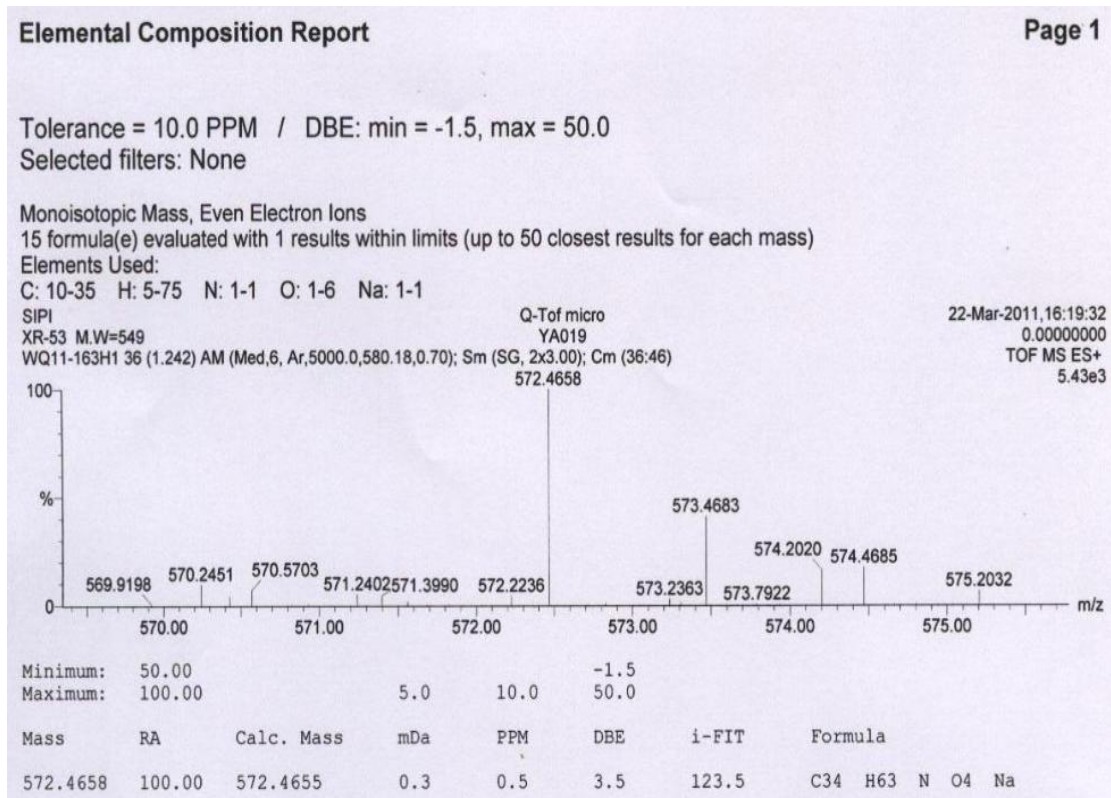

Figure S2. ESI-MS (positive and negative) spectrum of compound 1.

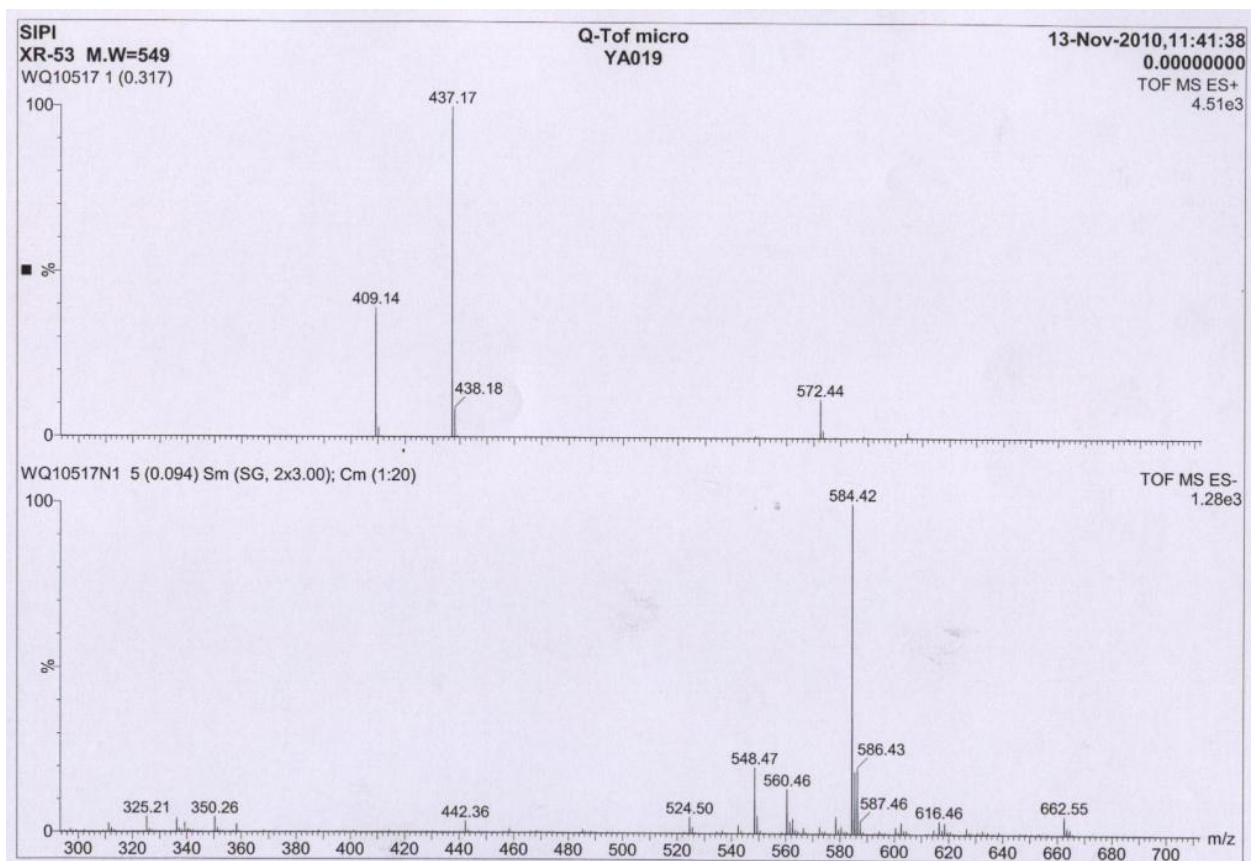

Figure S3. ESI-MS (positive and negative) fragments spectrum of compound 1.

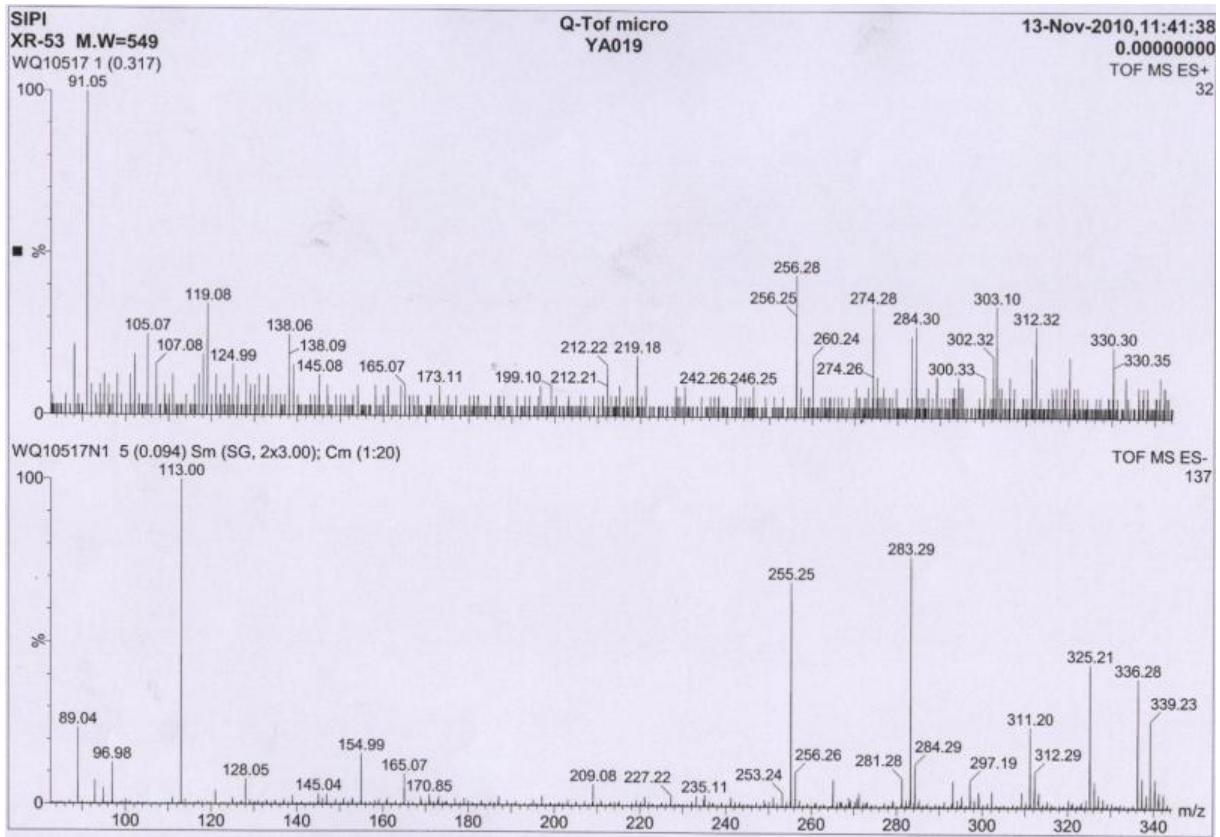

Figure S4. <sup>1</sup>H-NMR spectrum of compound 1.

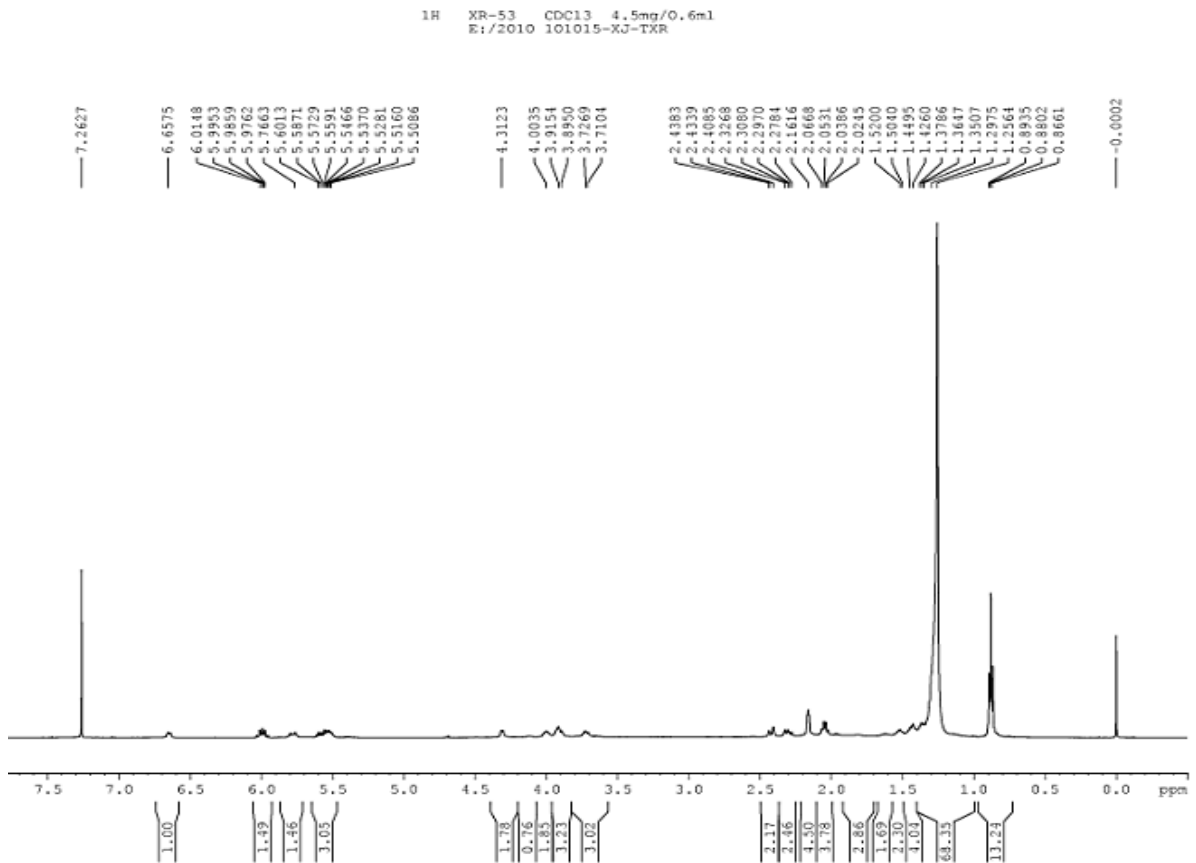

**Figure S5.**  $^{13}\text{C}$ -NMR spectrum of compound 1.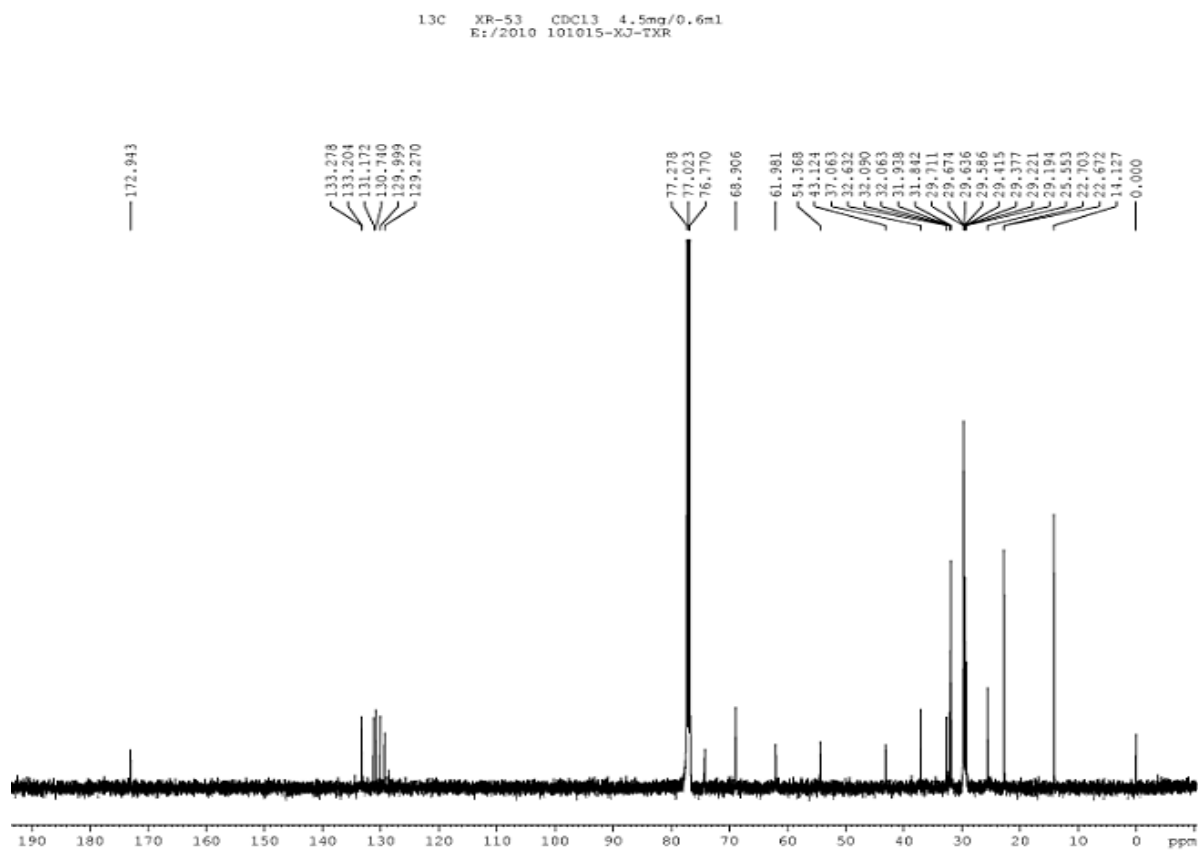**Figure S6.** DEPT spectrum of compound 1.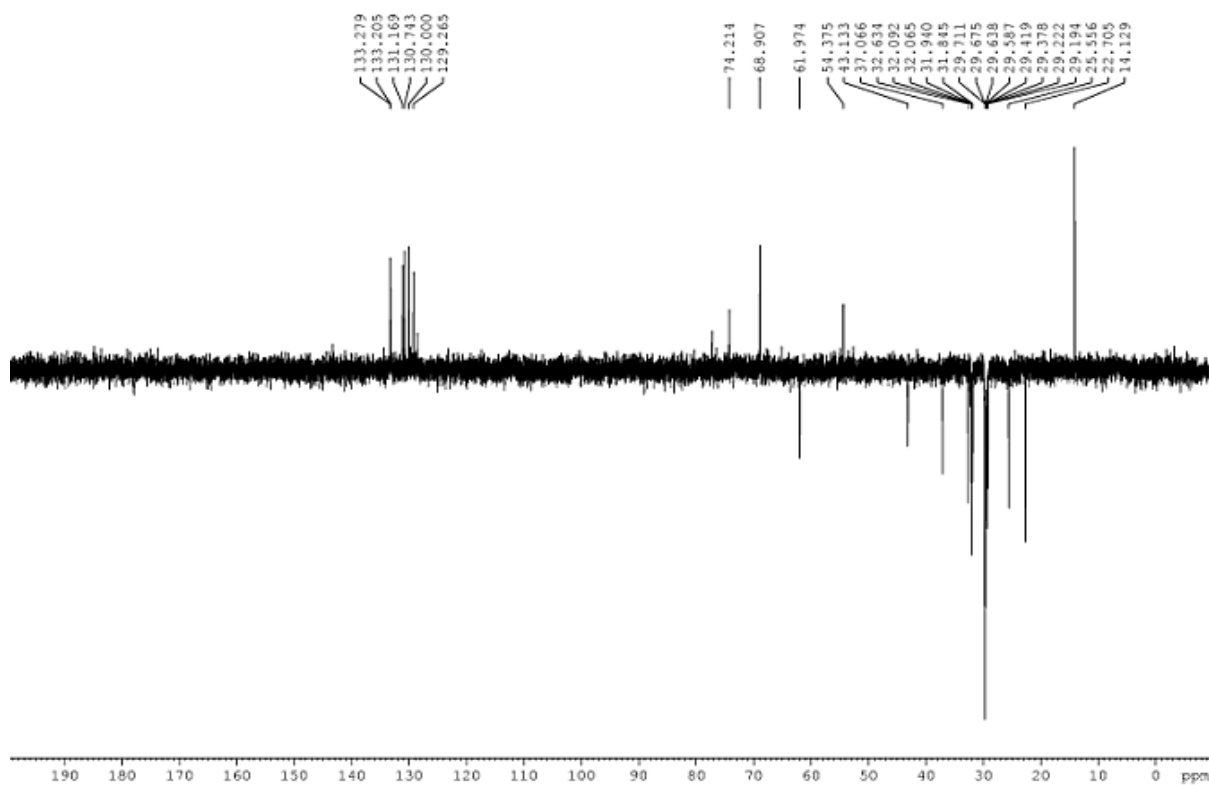

Figure S7. HSQC spectrum of compound 1.

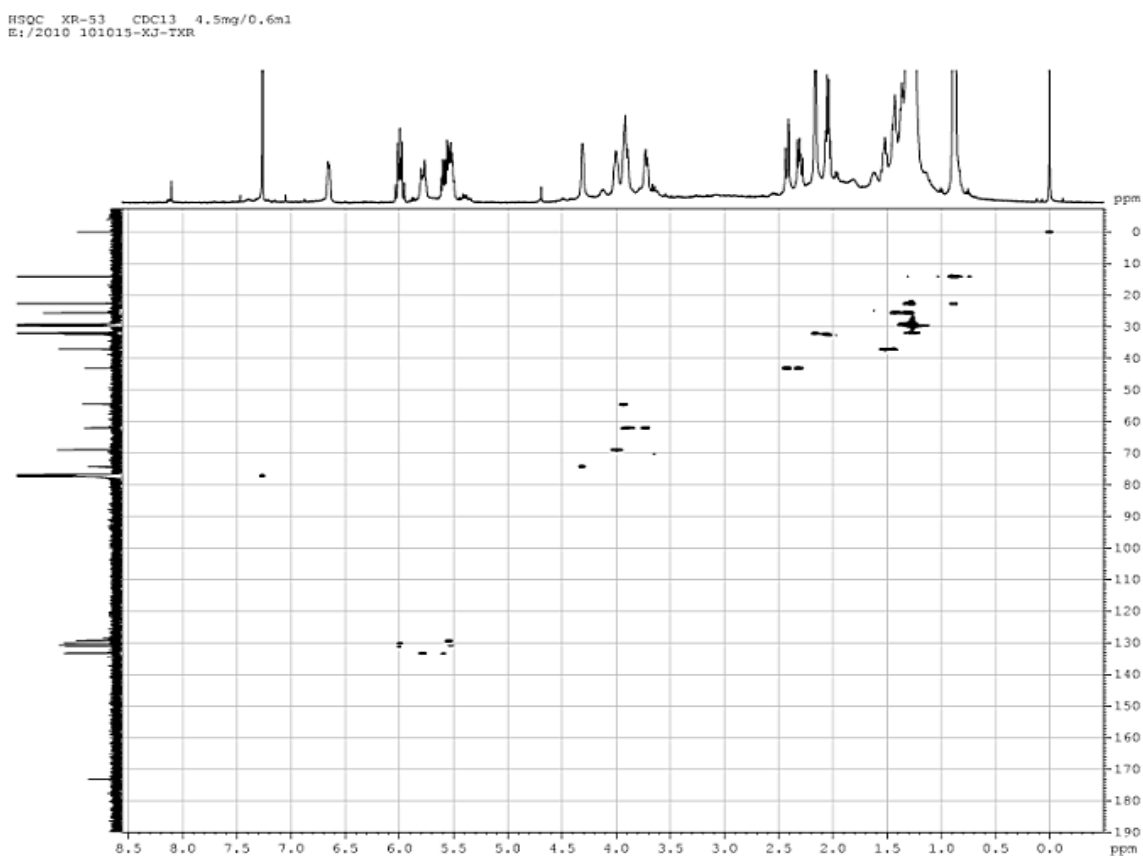

Figure S8. HMBC spectrum of compound 1.

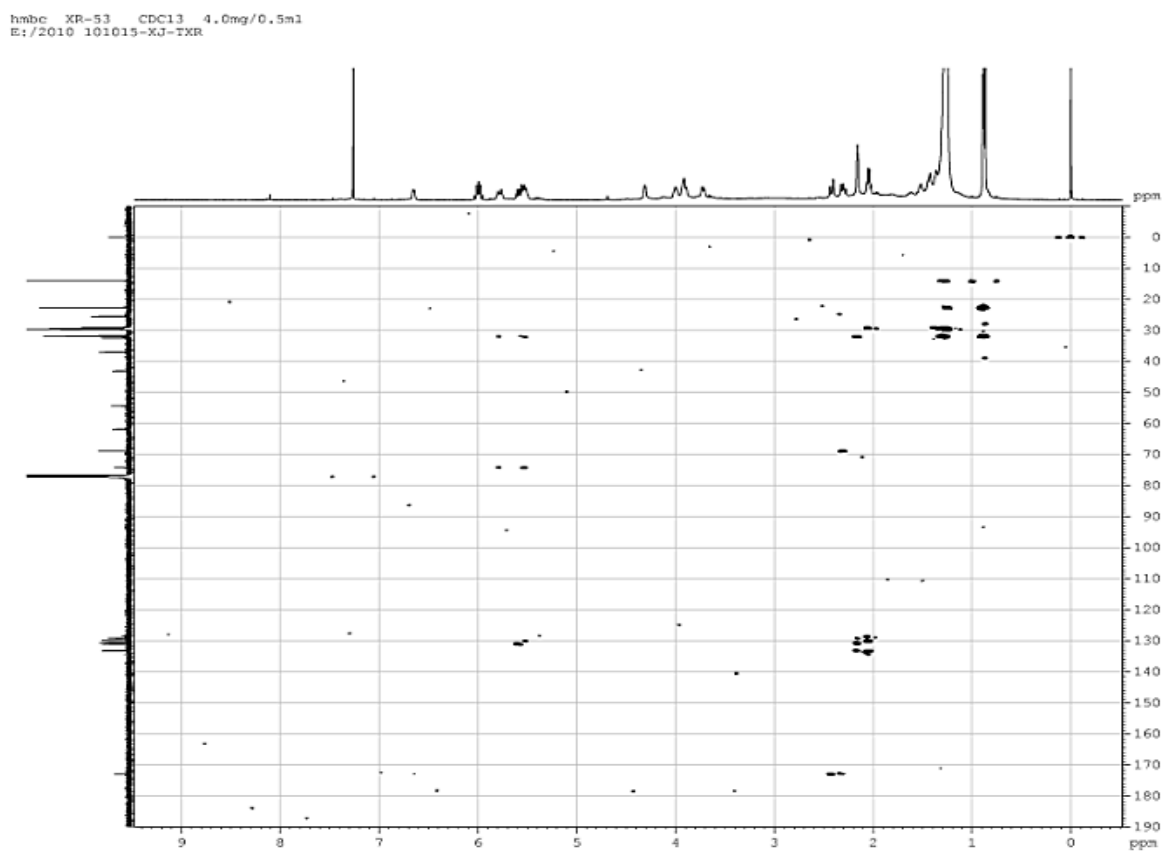

**Figure S9.**  $^1\text{H}$ - $^1\text{H}$  COSY spectrum of compound 1.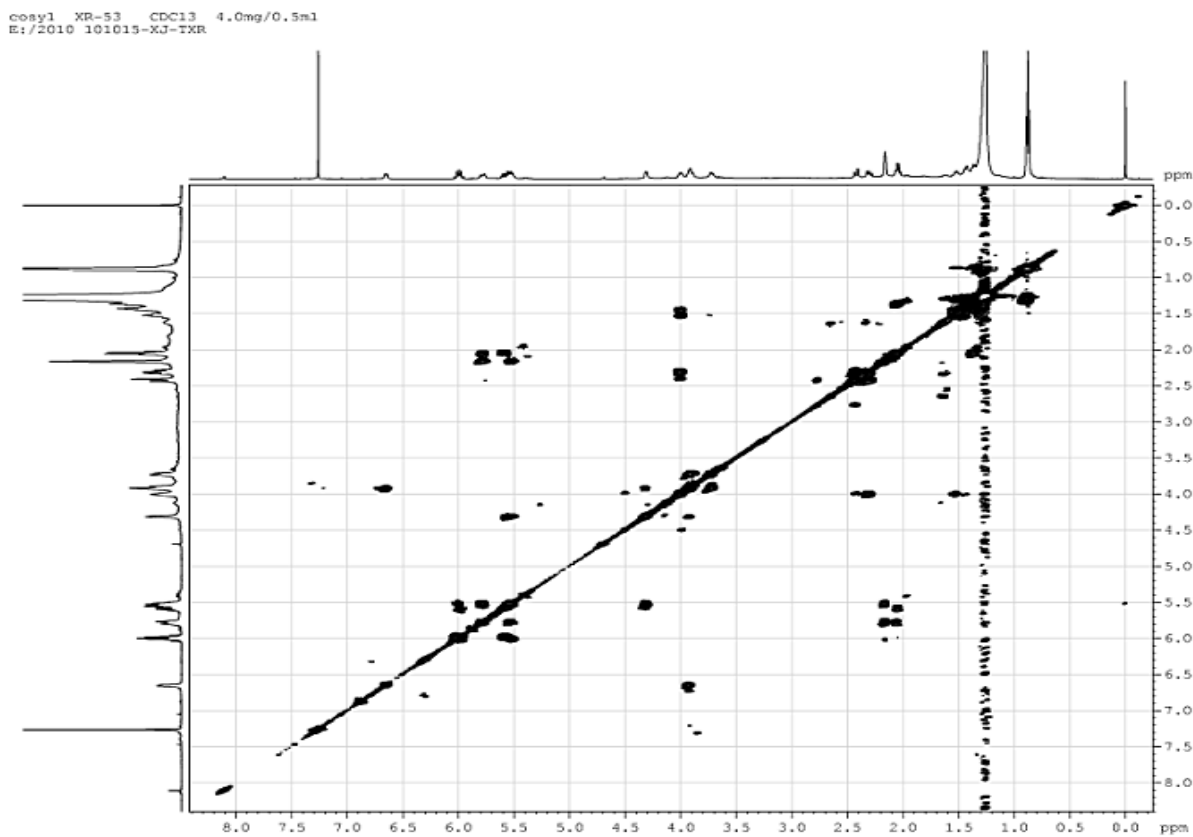**Figure S10.** NOESY spectrum of compound 1.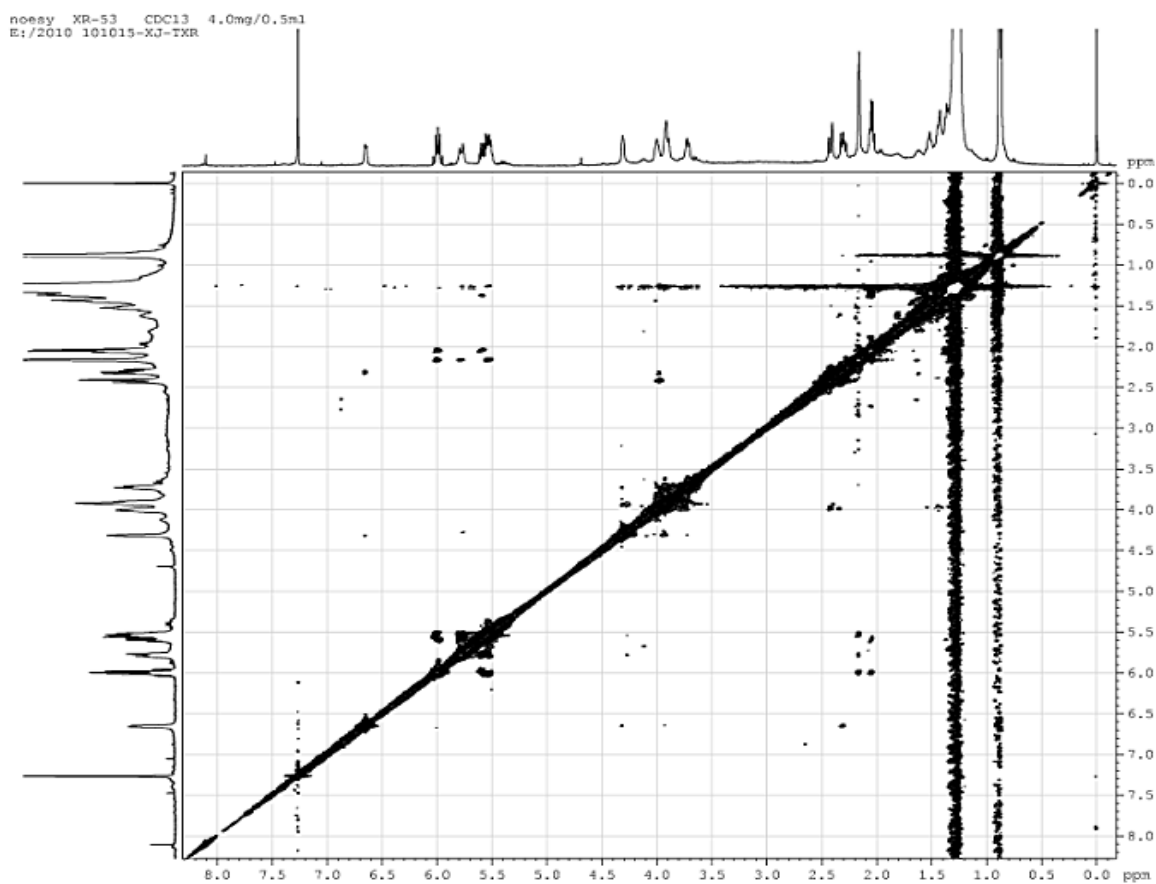

Figure S11. EI-MS data of FAME 1.

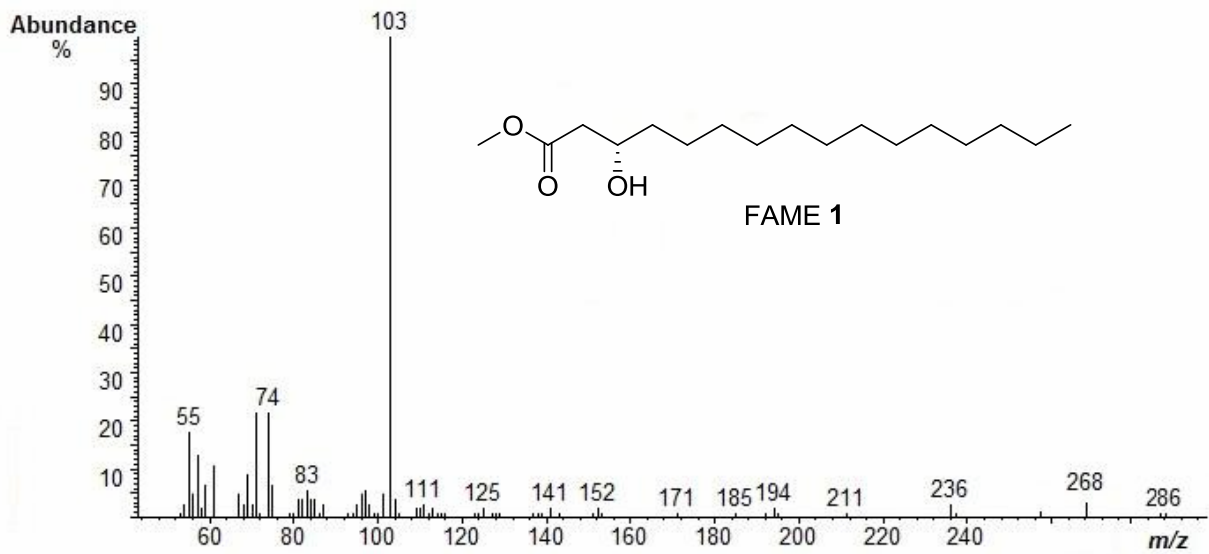

Figure S12. HR-ESI-MS (positive) spectrum of compound 2.

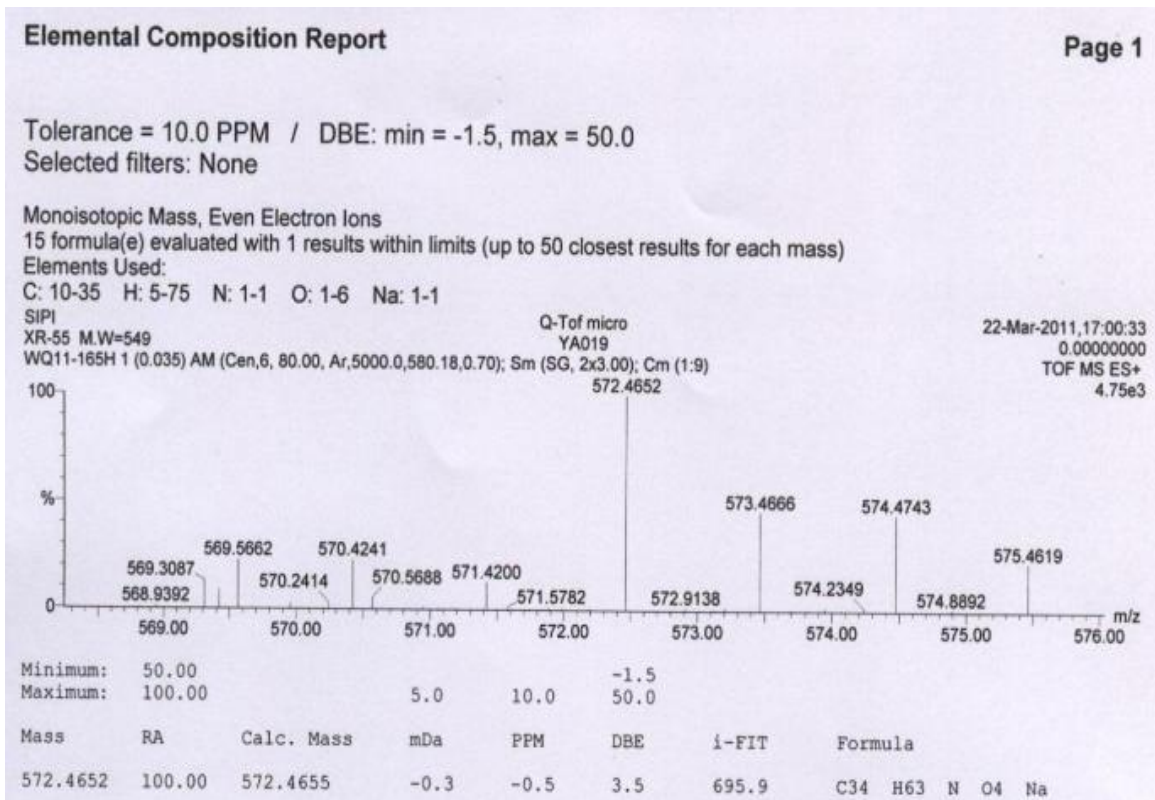



Figure S13. ESI-MS (positive and negative) spectrum of compound 2.

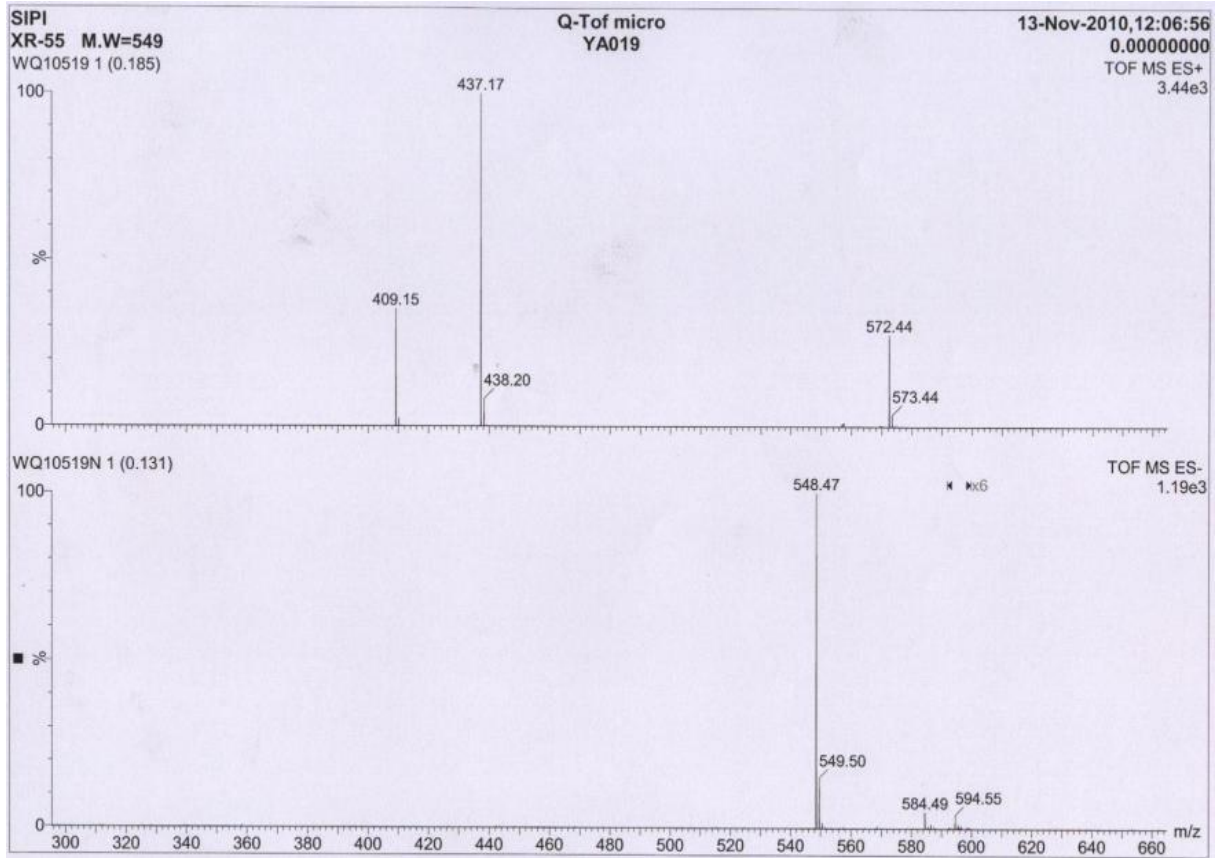

Figure S14. ESI-MS (positive and negative) fragments spectrum of compound 2.

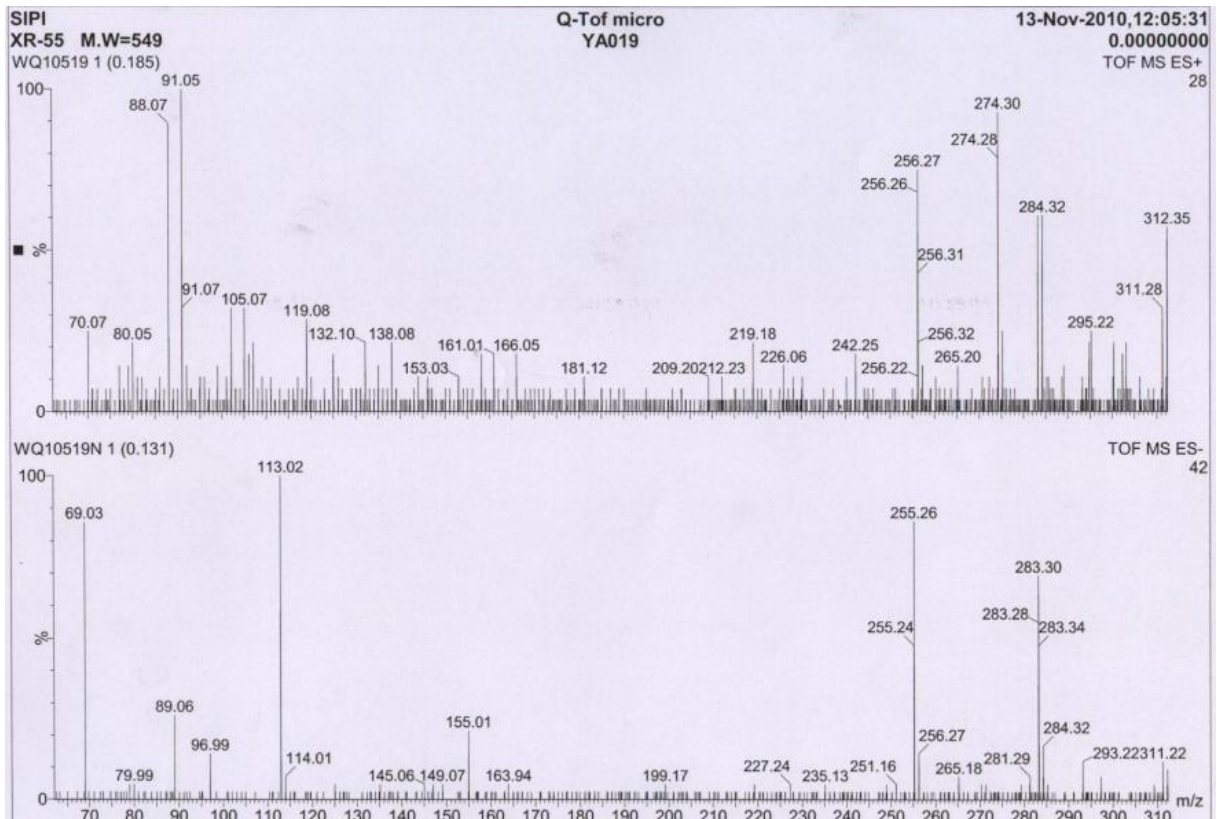



Figure S15. <sup>1</sup>H-NMR spectrum of compound 2.

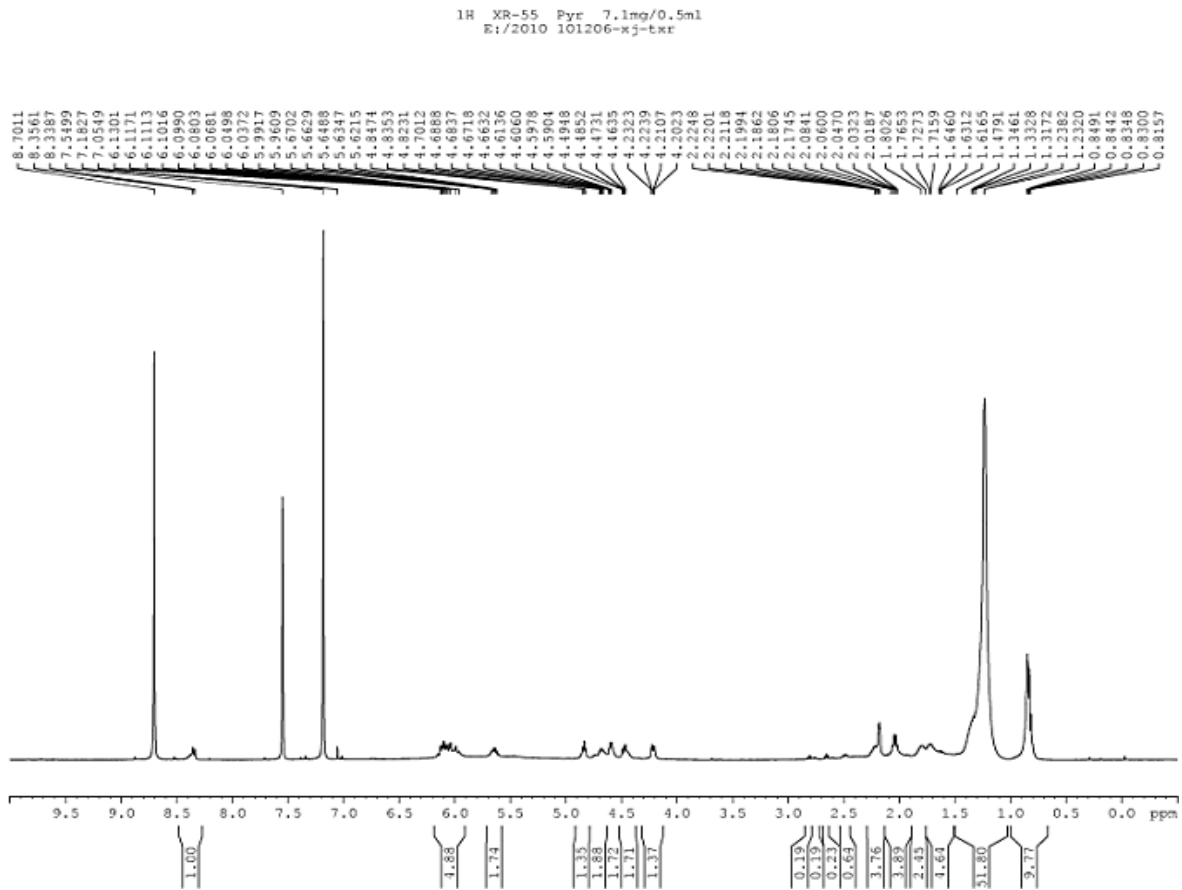

Figure S16. <sup>13</sup>C-NMR spectrum of compound 2.

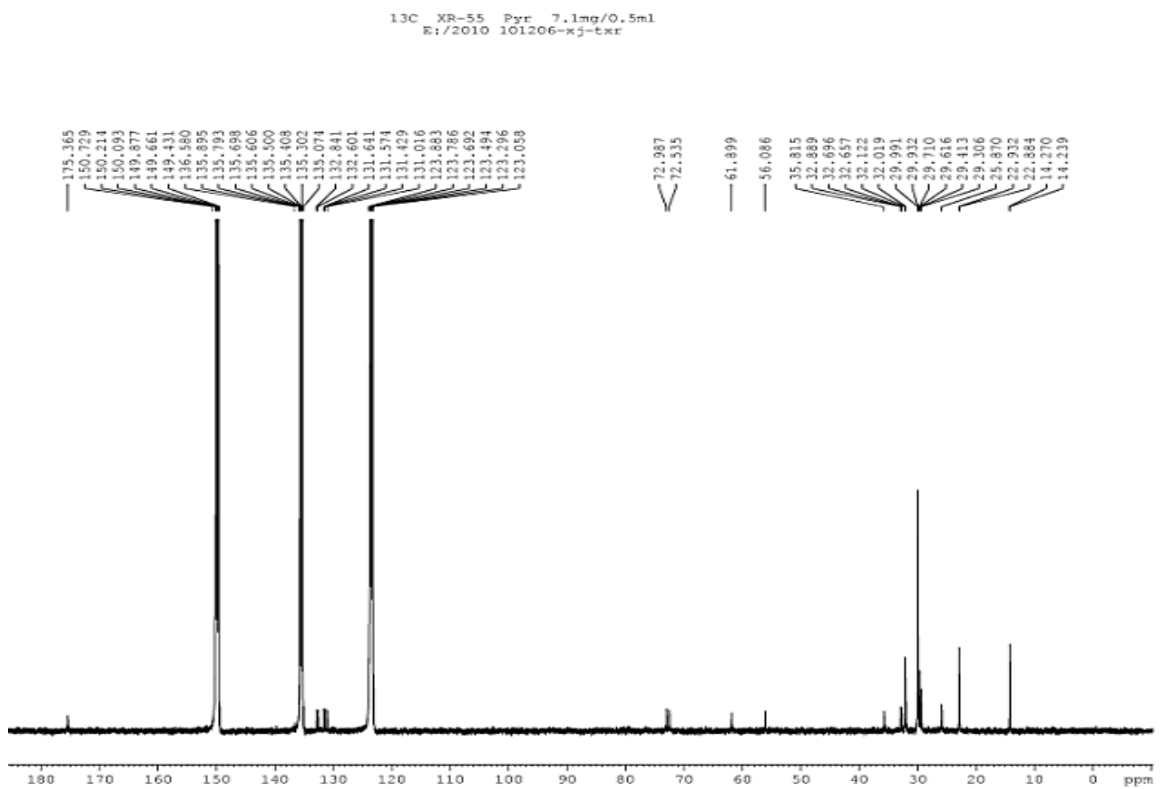

Figure S17. DEPT spectrum of compound 2.

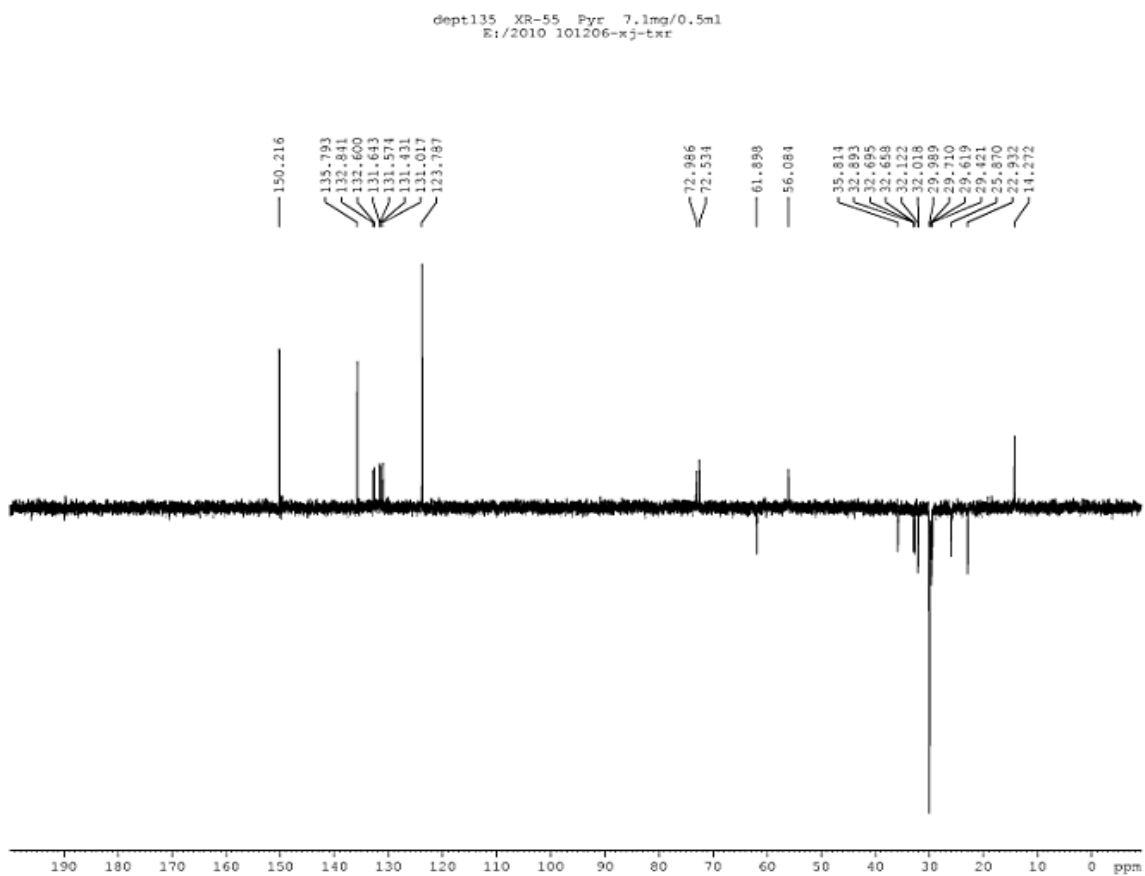

Figure S18. HSQC spectrum of compound 2.

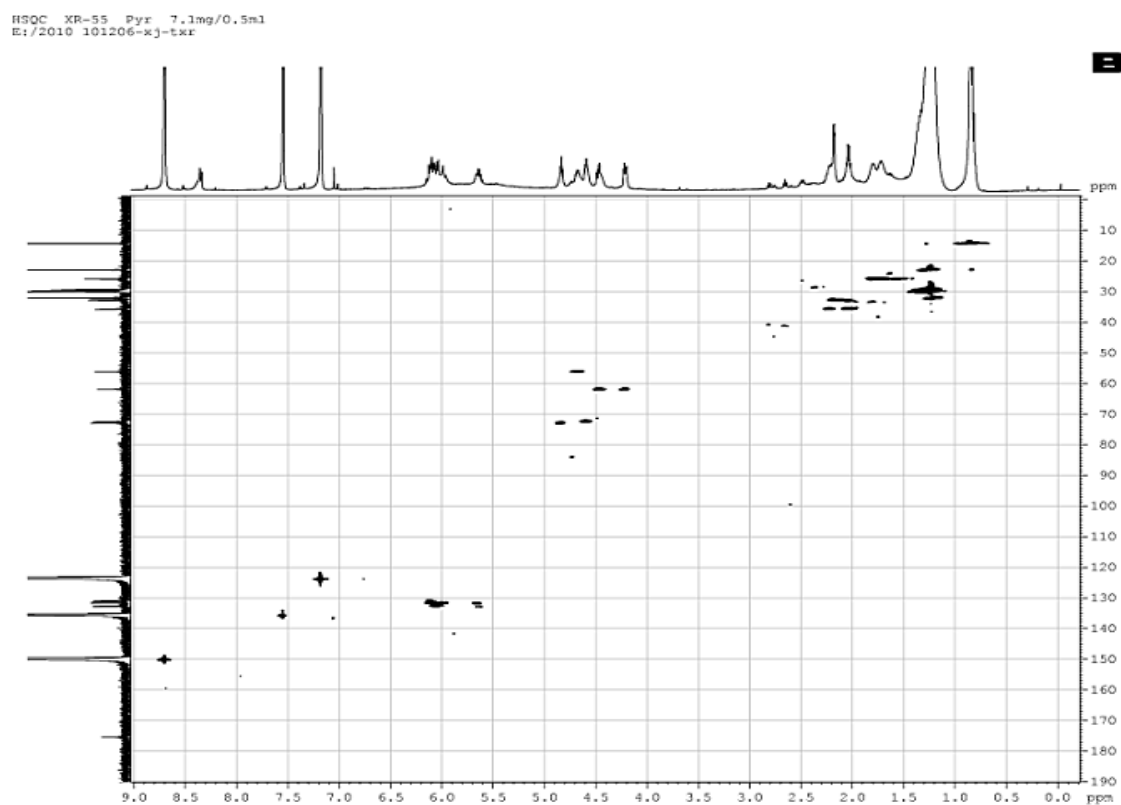

Figure S19. HMBC spectrum of compound 2.

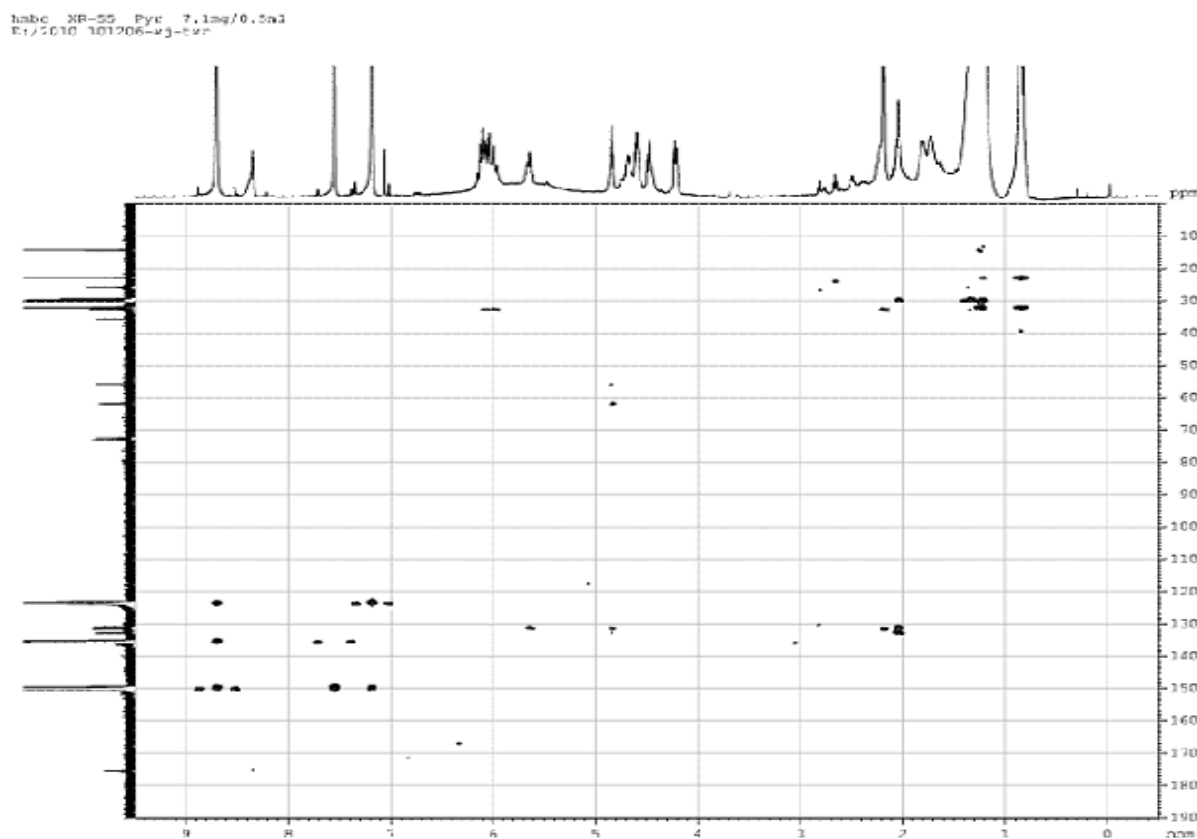Figure S20.  $^1\text{H}$ - $^1\text{H}$  COSY spectrum of compound 2.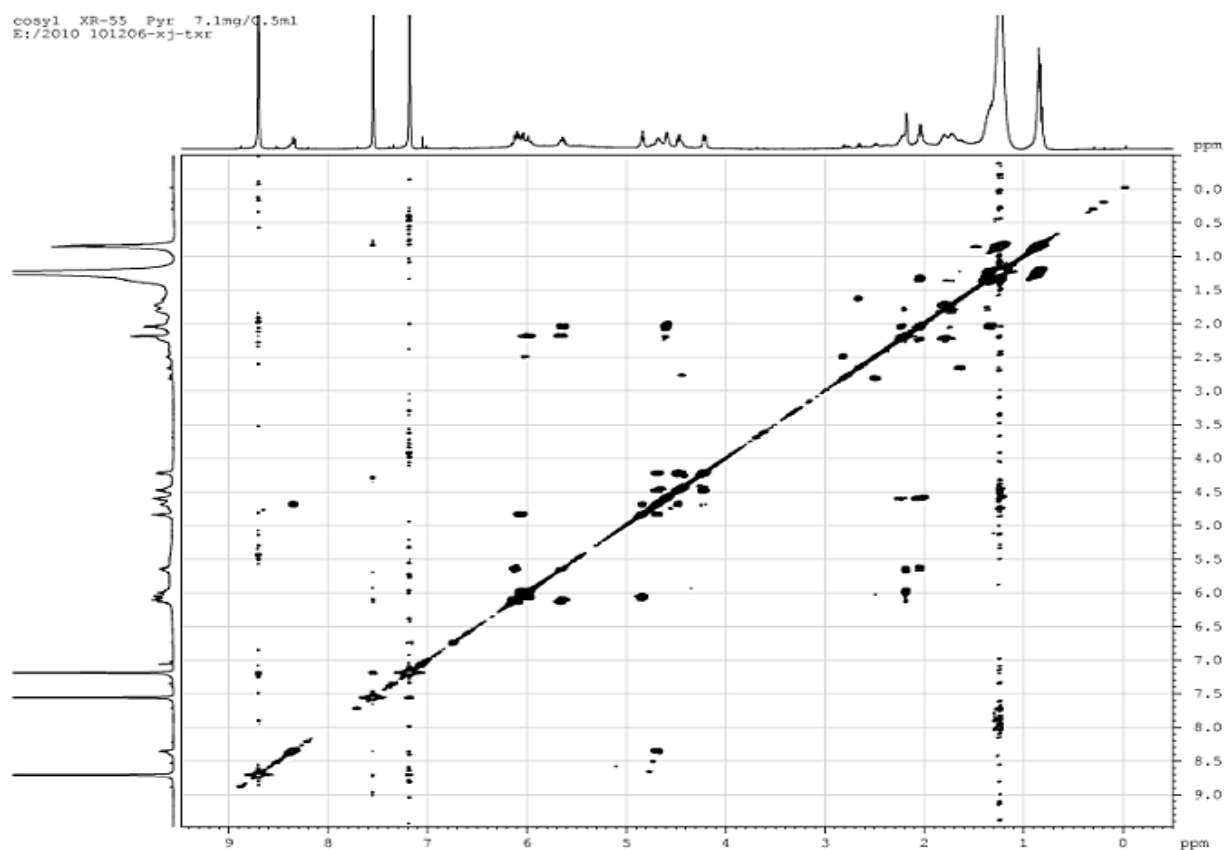

Figure S21. NOESY spectrum of compound 2.

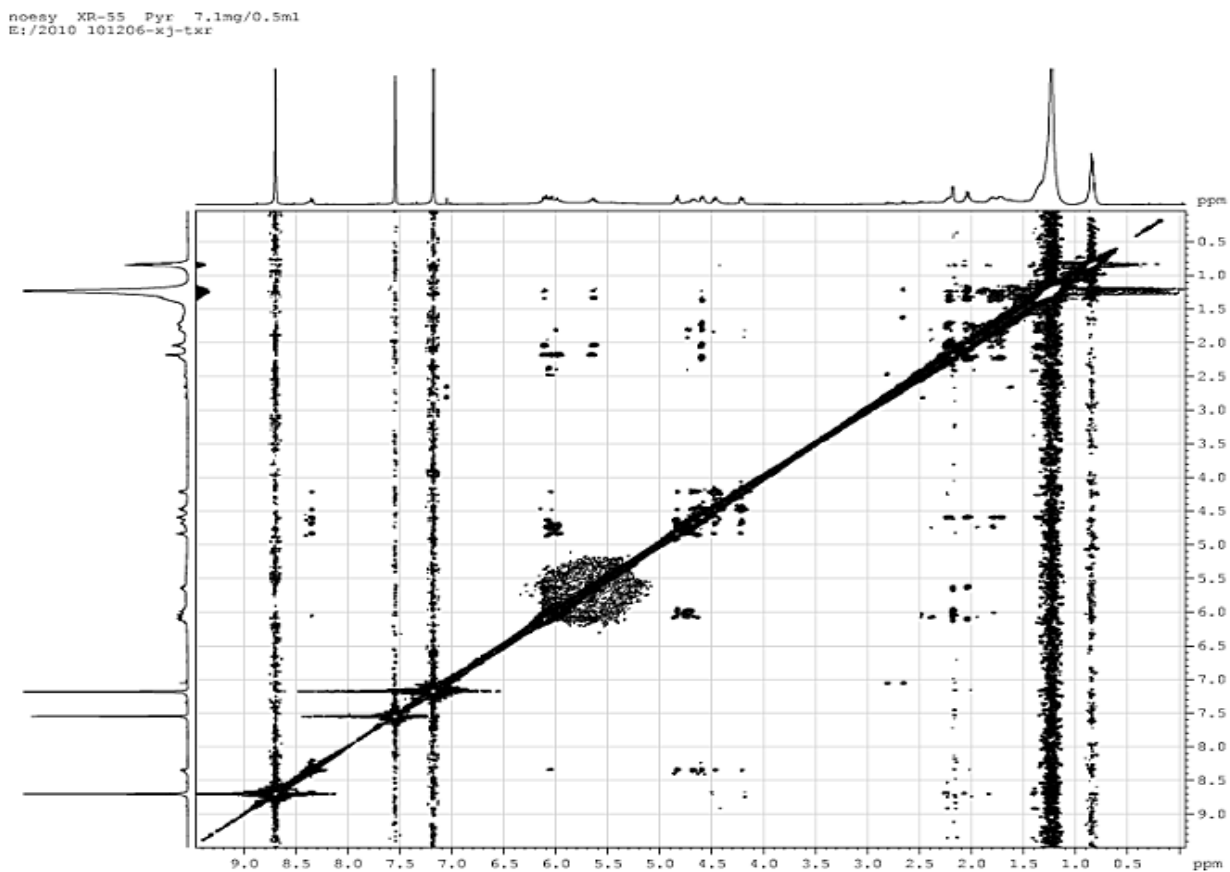

Figure S22. EI-MS data of FAME 2.

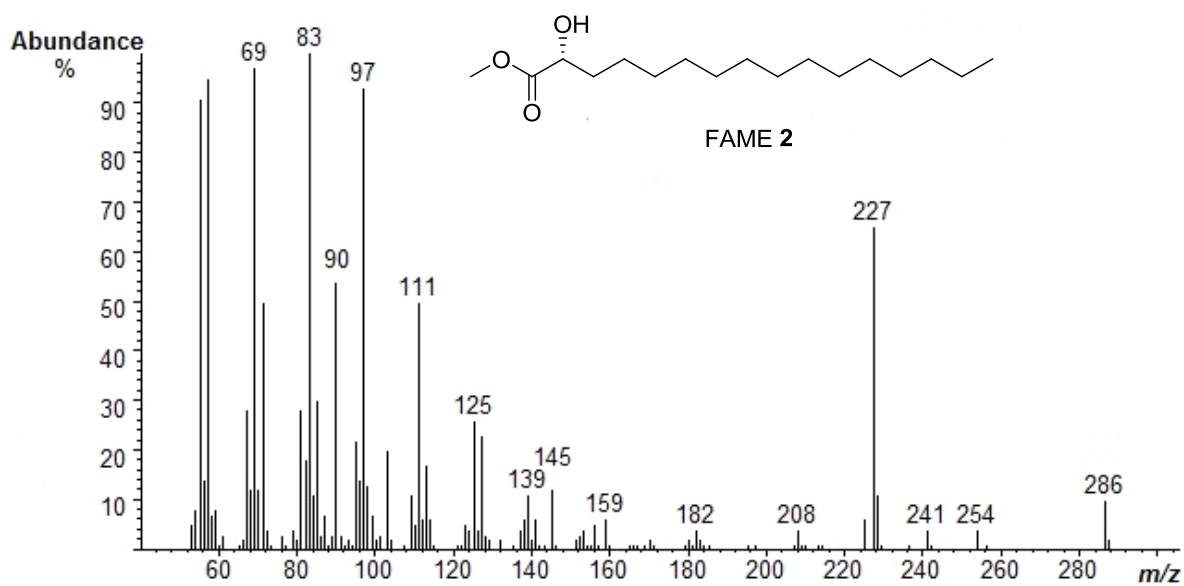

Figure S23. ESI-MS (positive and negative) spectrum of compound 3.

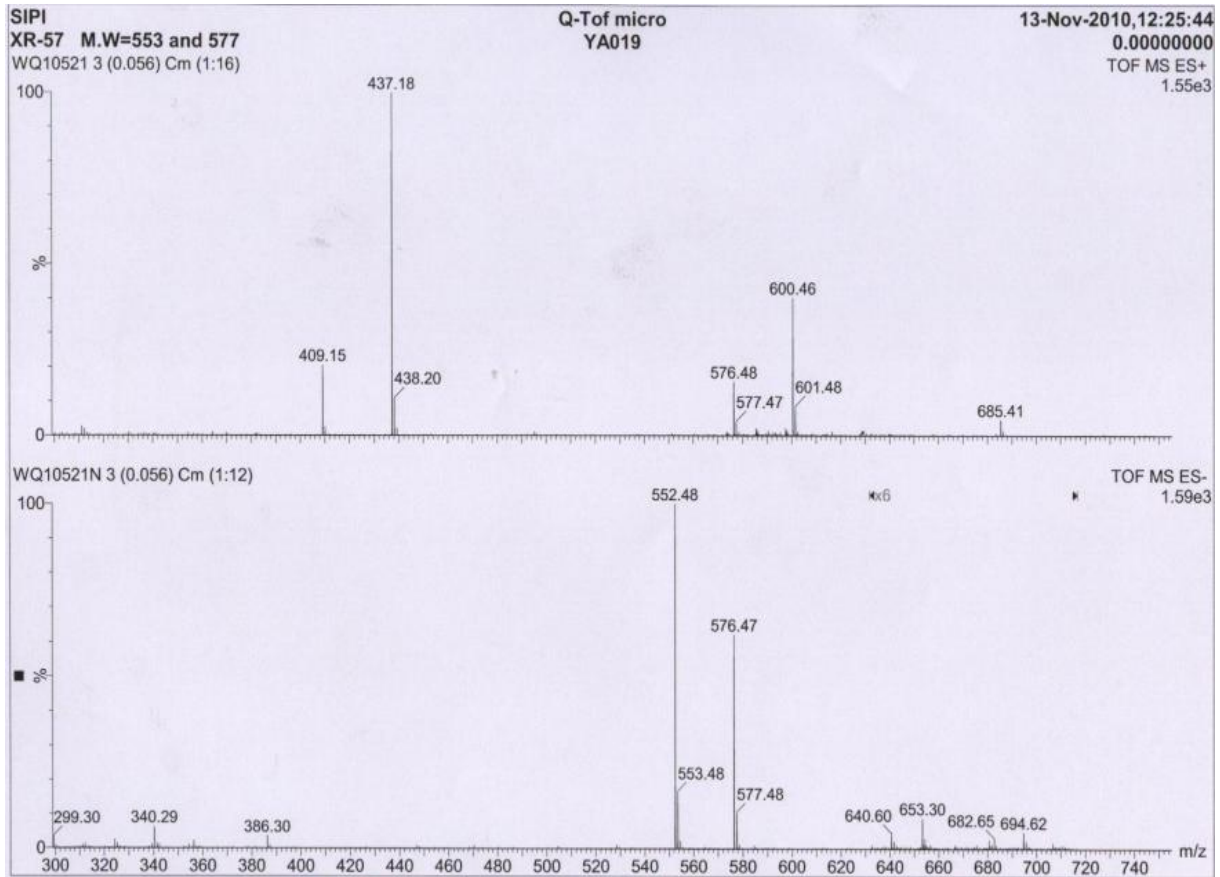

Figure S24. ESI-MS (positive and negative) fragments spectrum of compound 3.

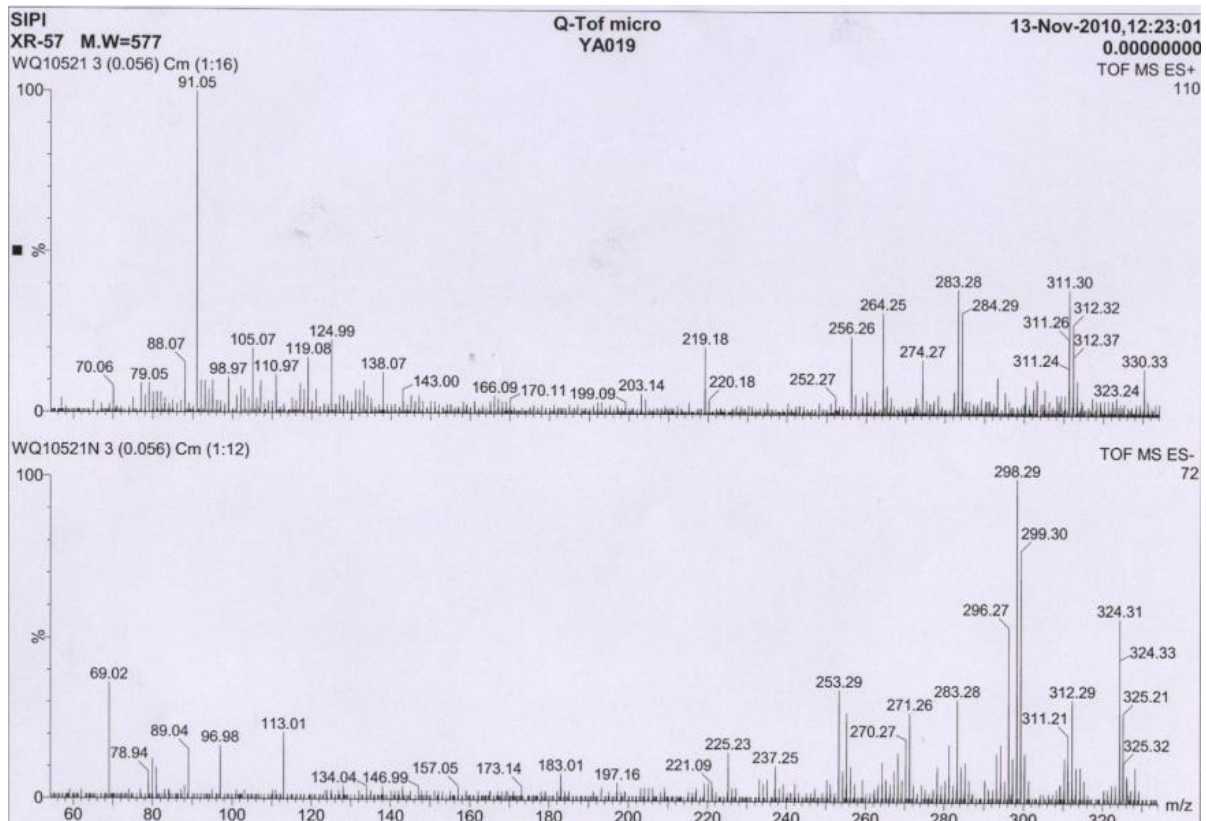

Figure S25.  $^1\text{H-NMR}$  spectrum of compound 3.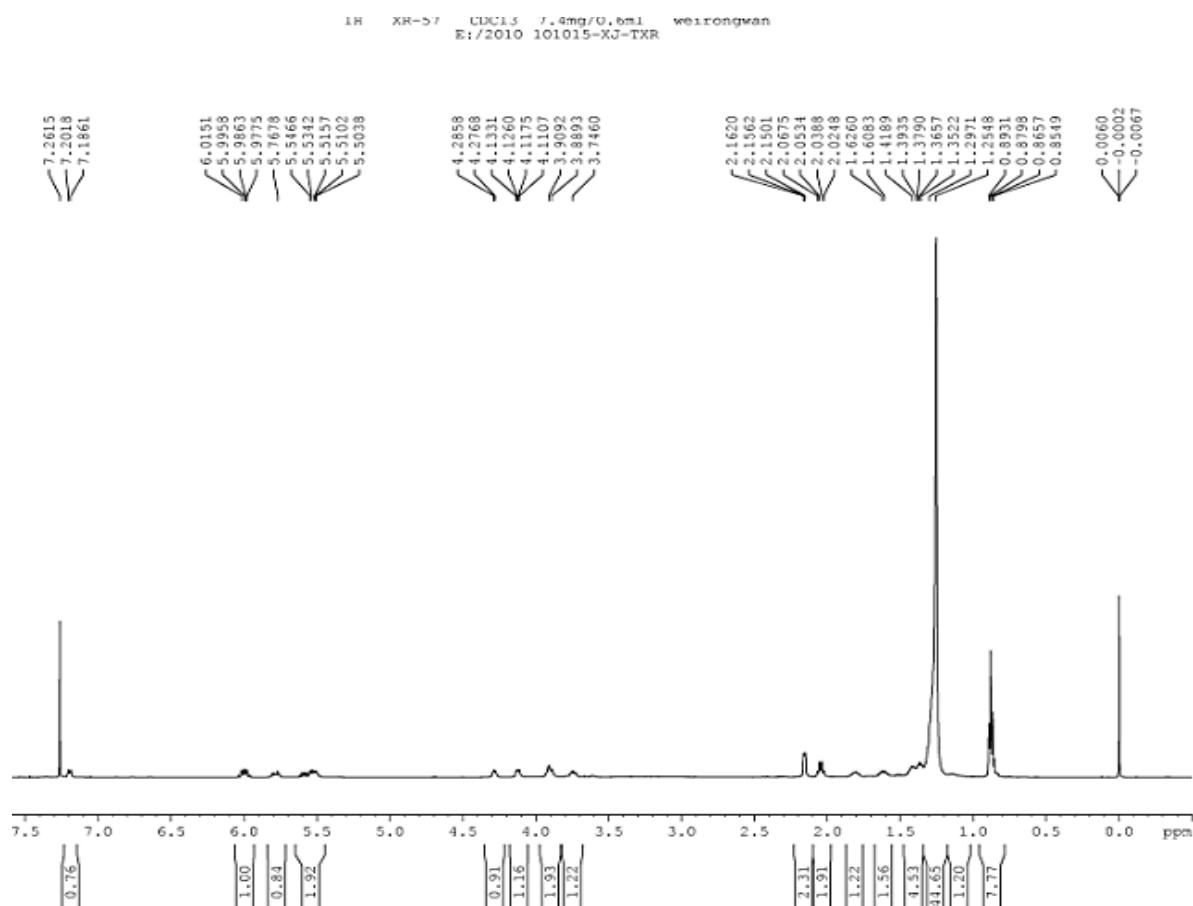Figure S26.  $^{13}\text{C-NMR}$  spectrum of compound 3.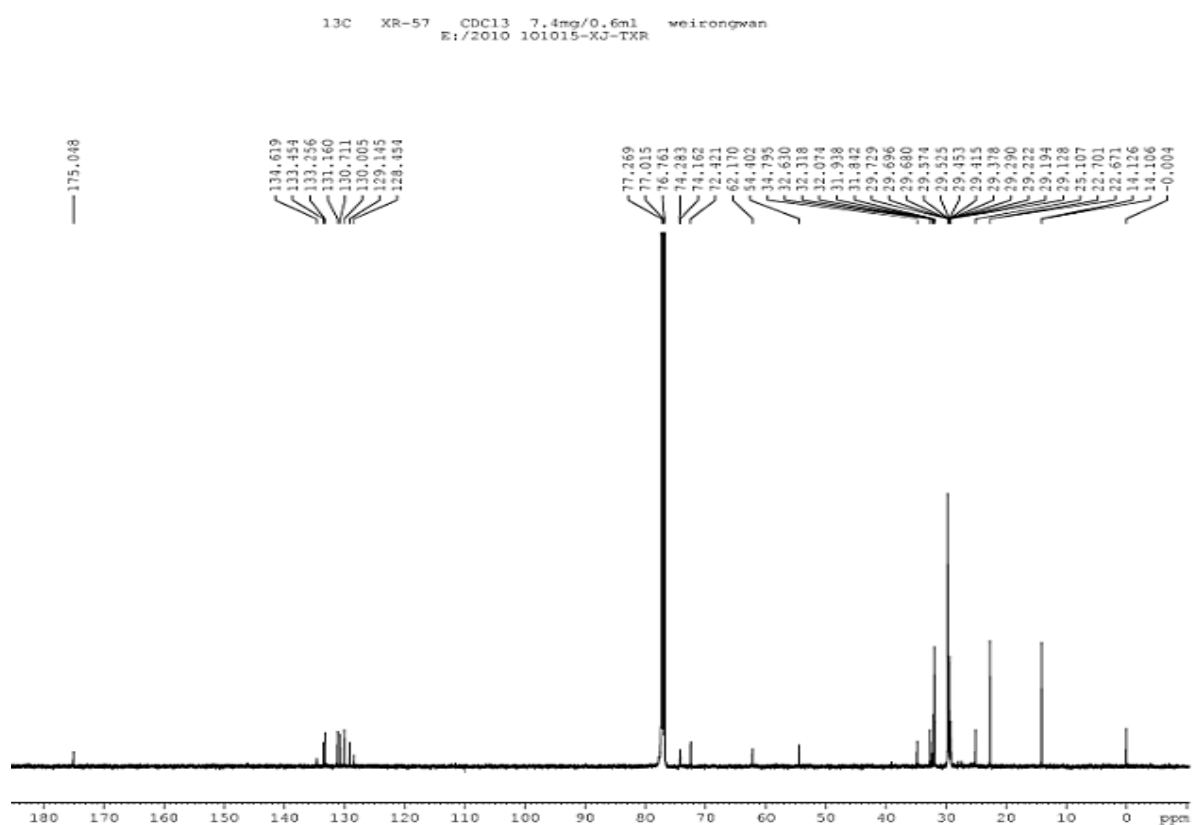



Figure S27. DEPT spectrum of compound 3.

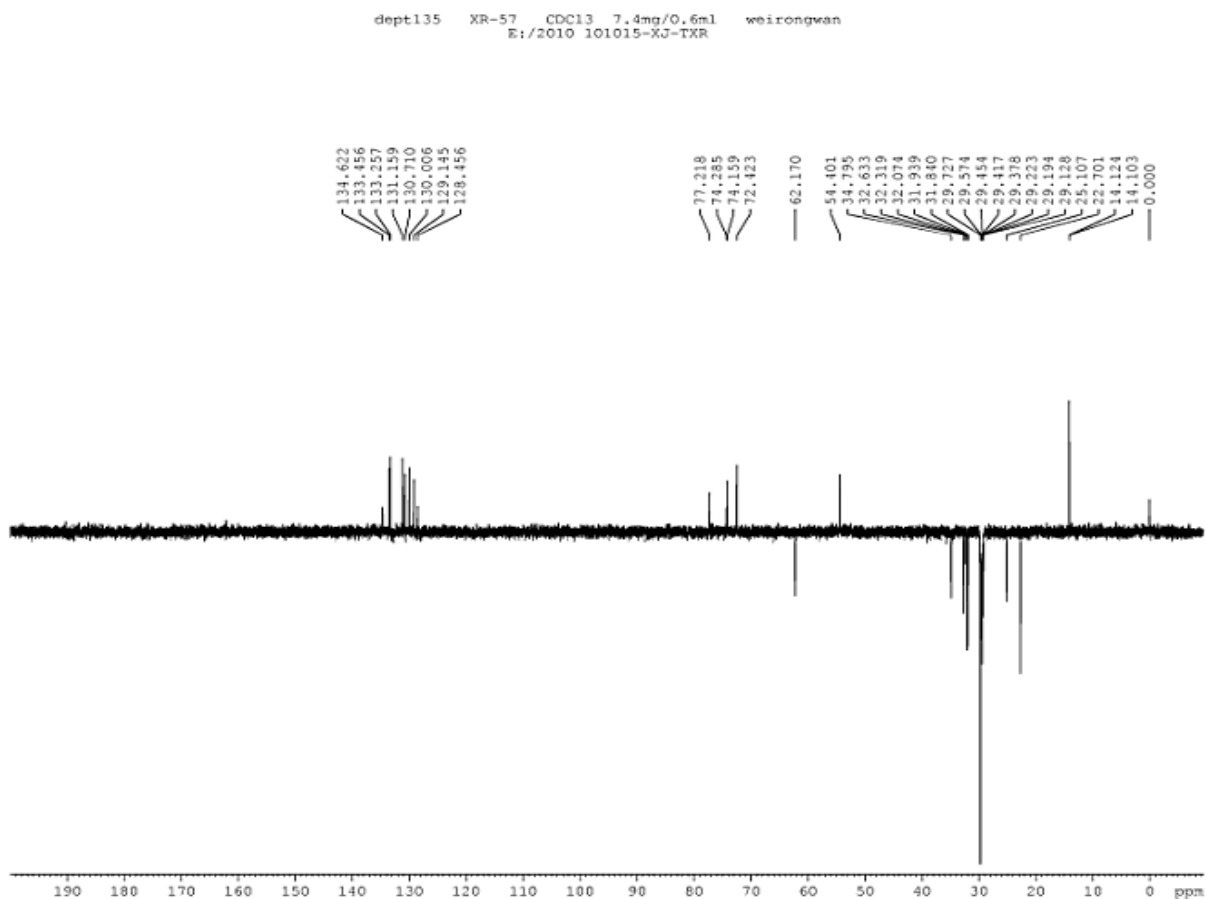

Figure S28. EI-MS data of FAME 3.

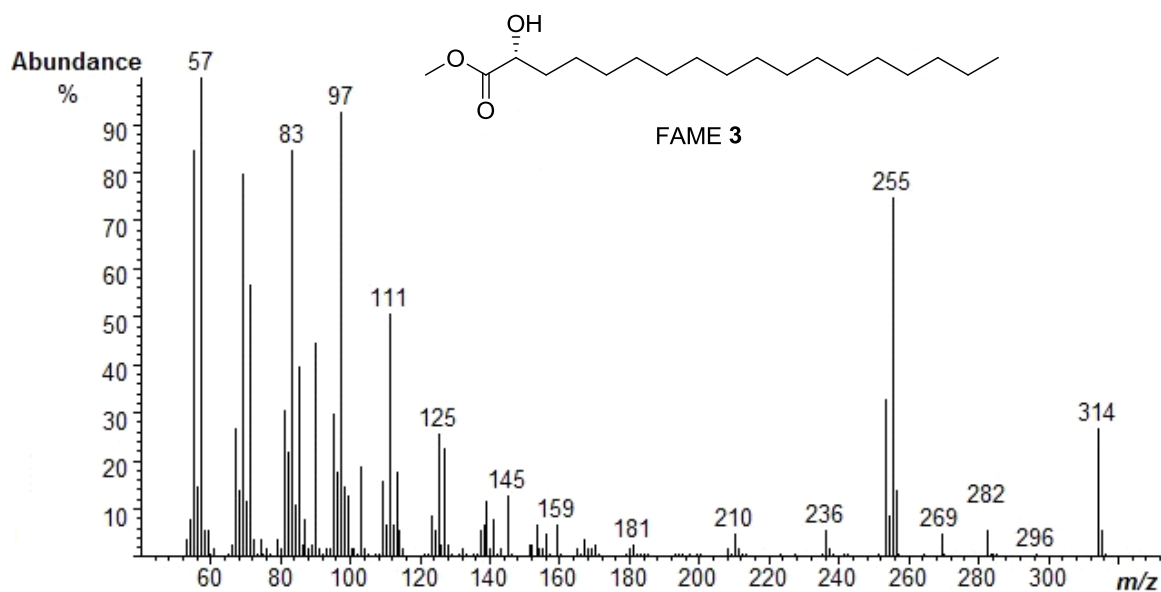

Figure S29. HR-ESI-MS (positive) spectrum of compound 4.

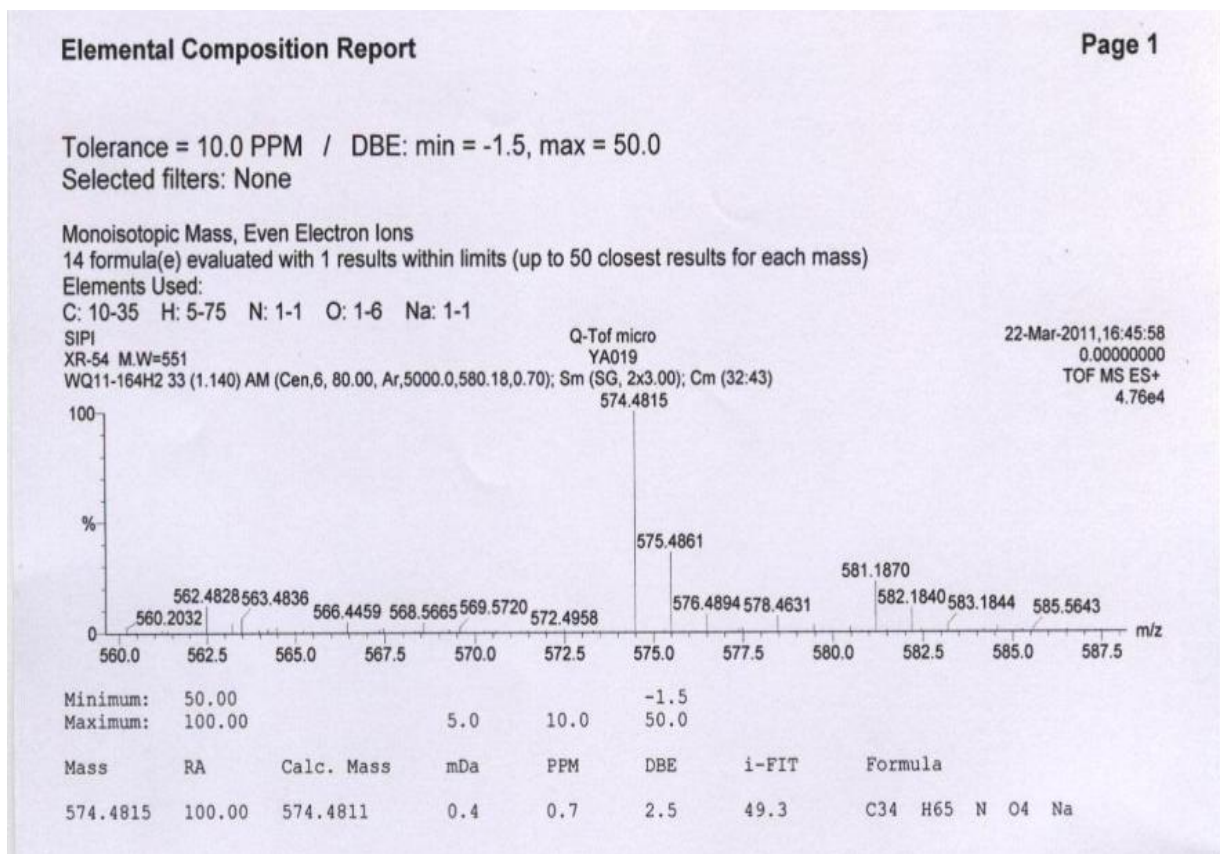

Figure S30. ESI-MS (positive and negative) spectrum of compound 4.

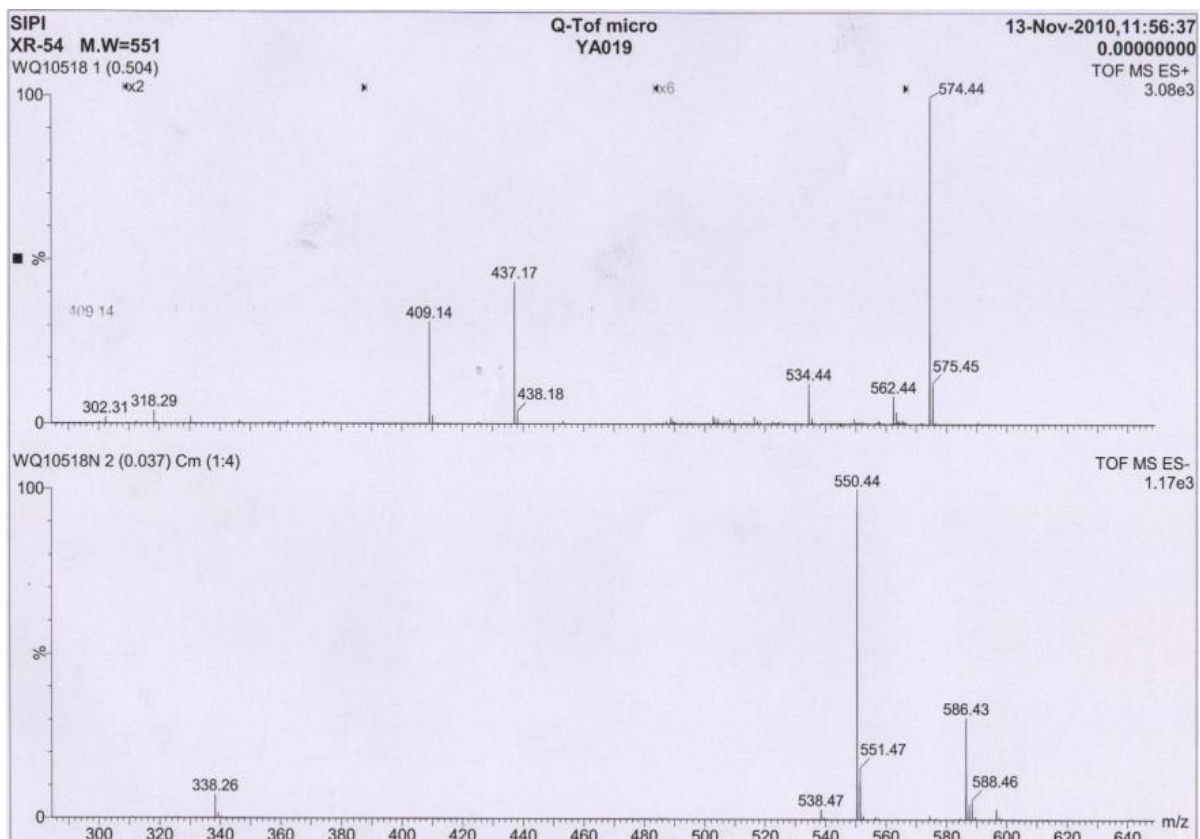

Figure S31. ESI-MS (positive and negative) fragments spectrum of compound 4.

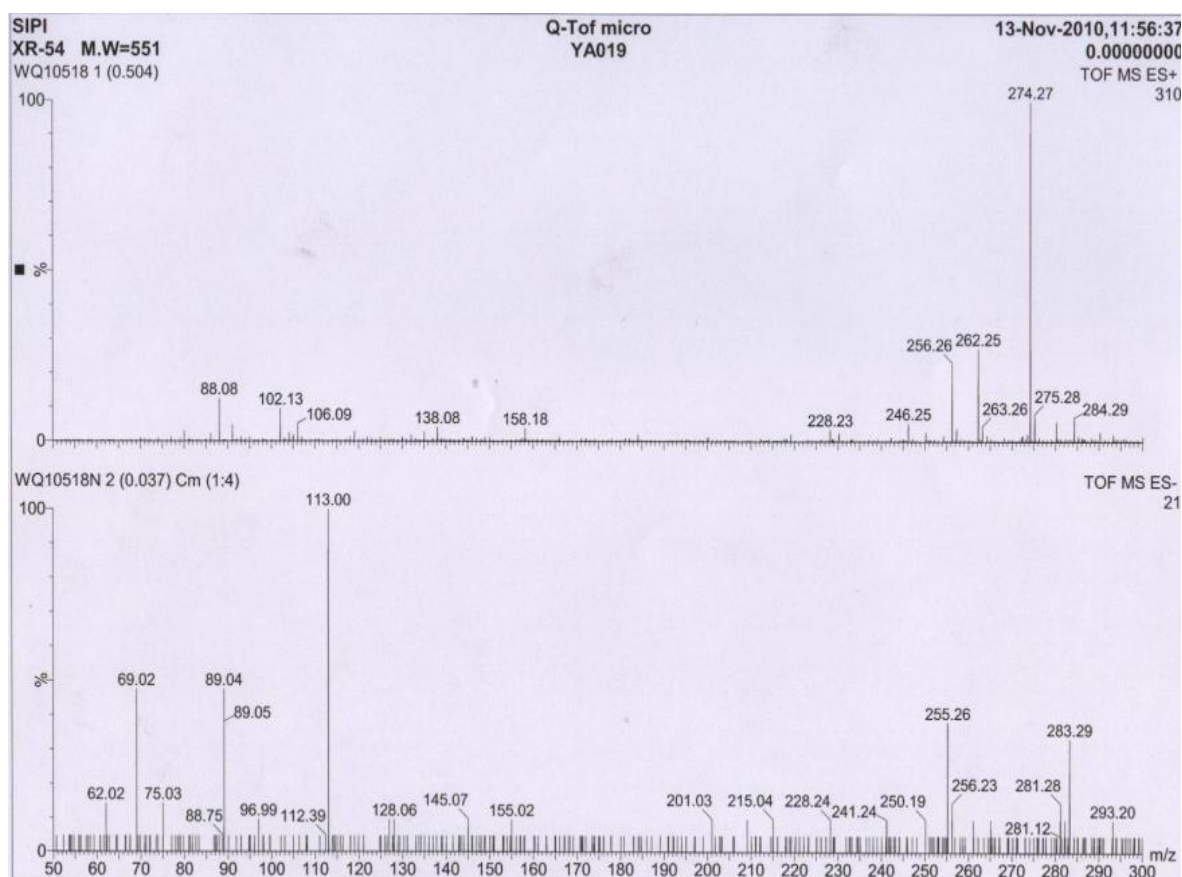Figure S32. <sup>1</sup>H-NMR spectrum of compound 4.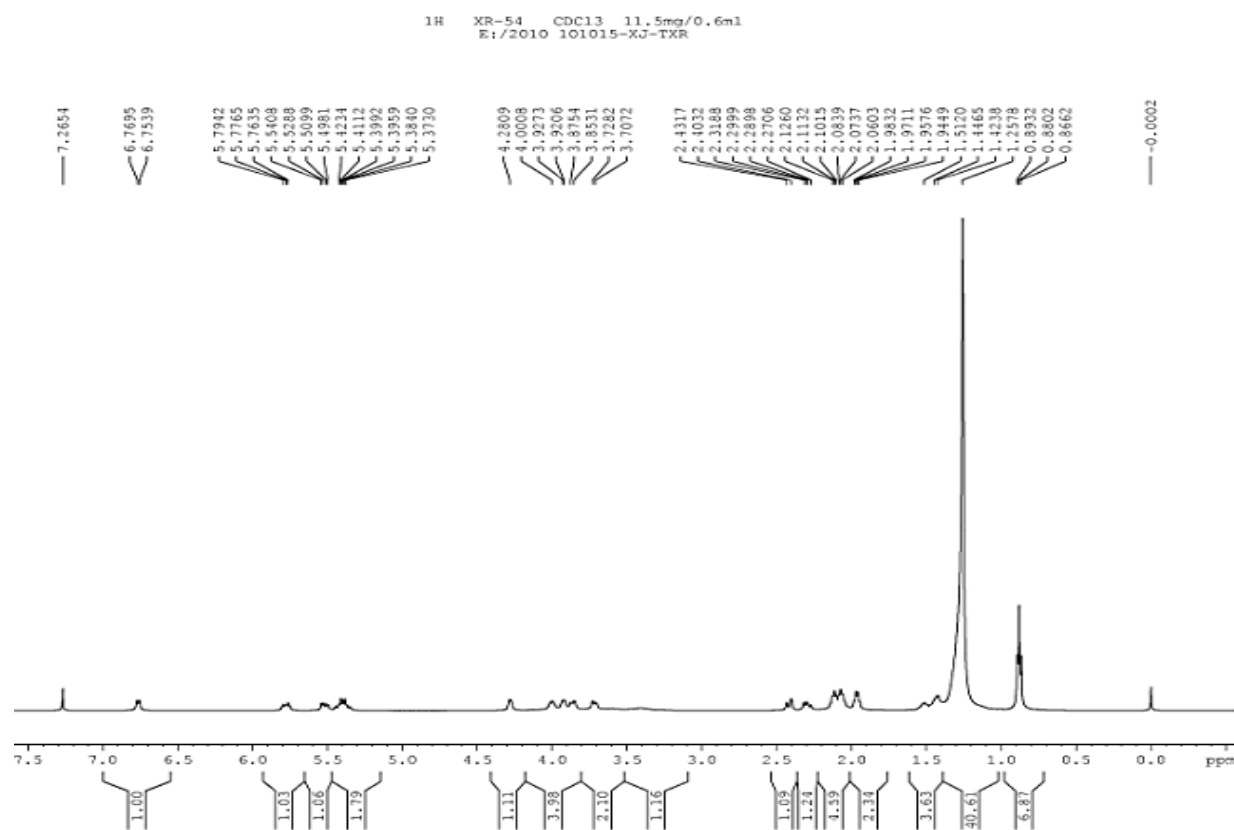

Figure S33.  $^{13}\text{C}$ -NMR spectrum of compound 4.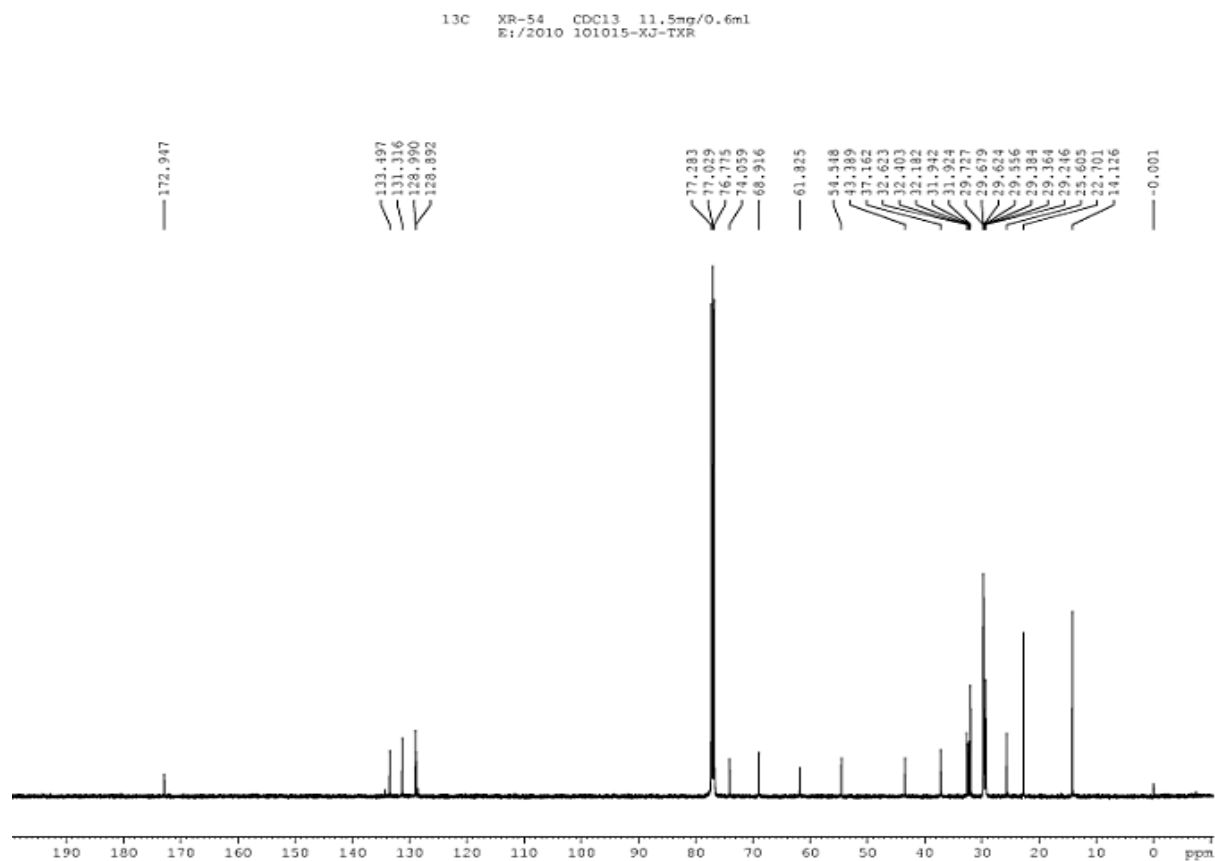

Figure S34. DEPT spectrum of compound 4.

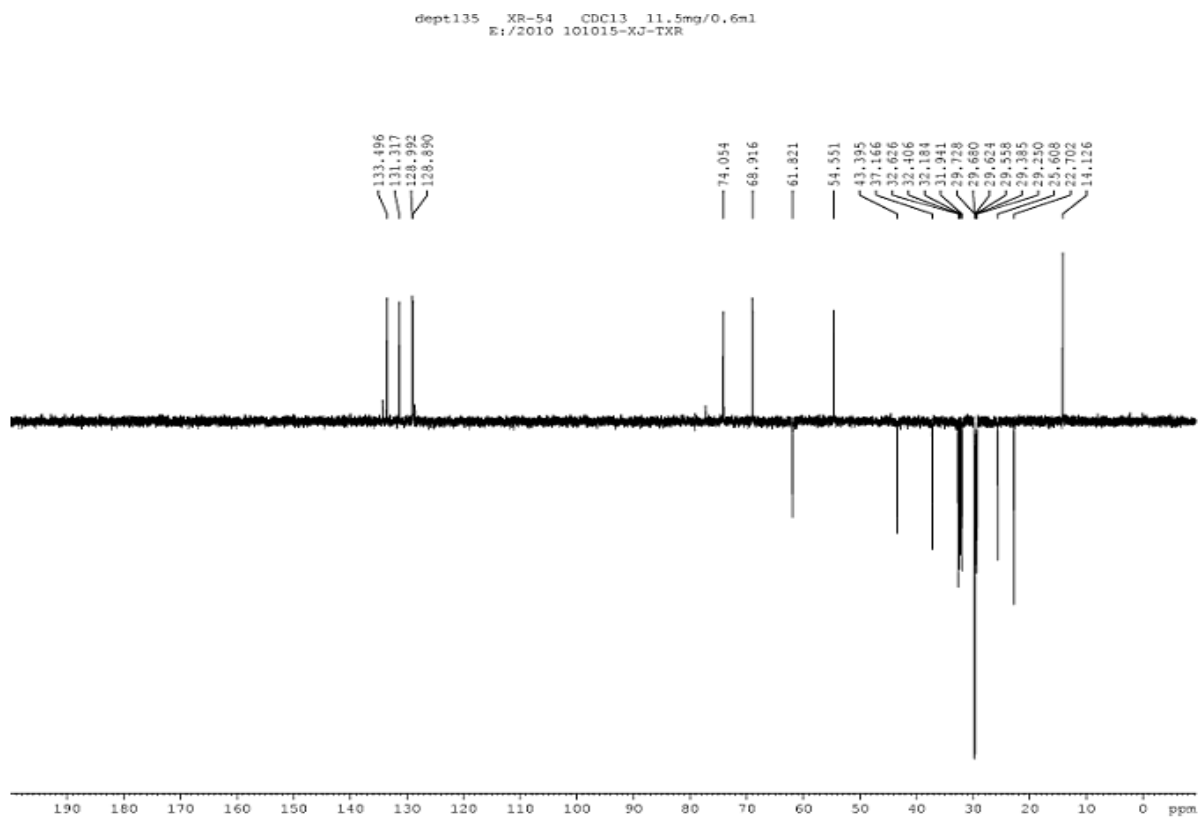

Figure S35. HR-ESI-MS (positive) spectrum of compound 5.

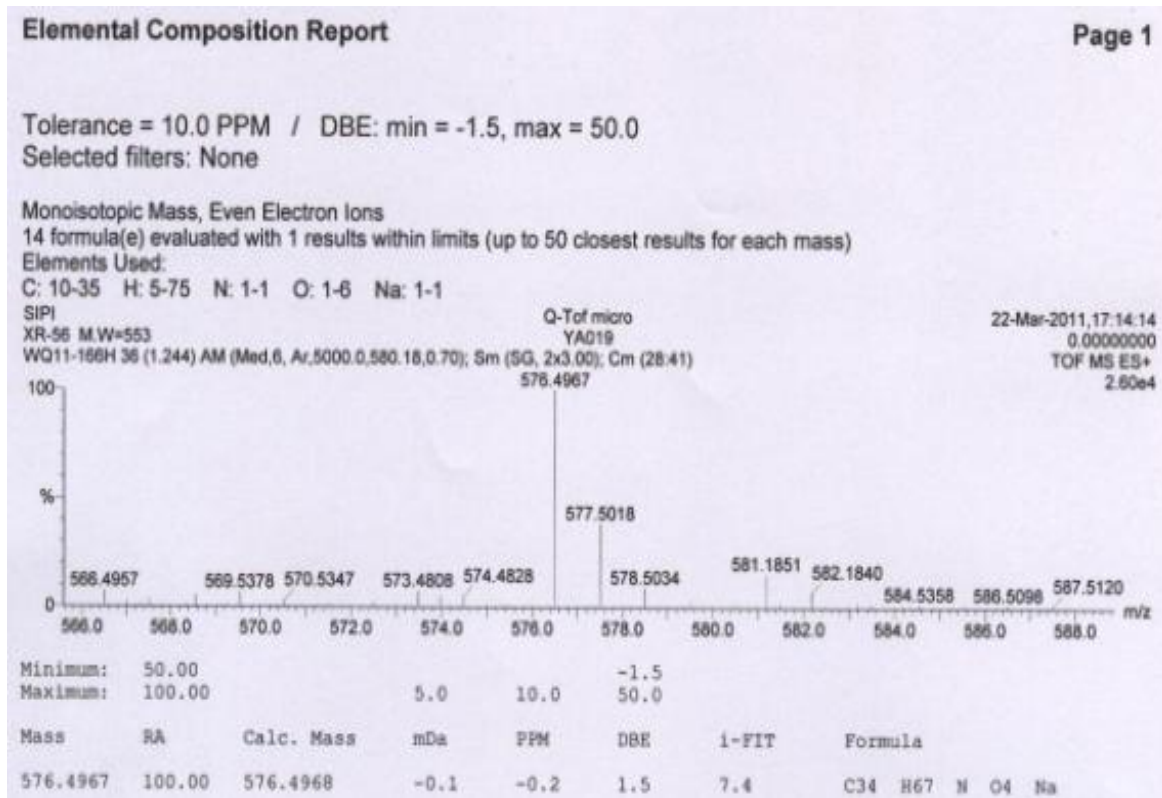

Figure S36. ESI-MS (positive and negative) spectrum of compound 5.

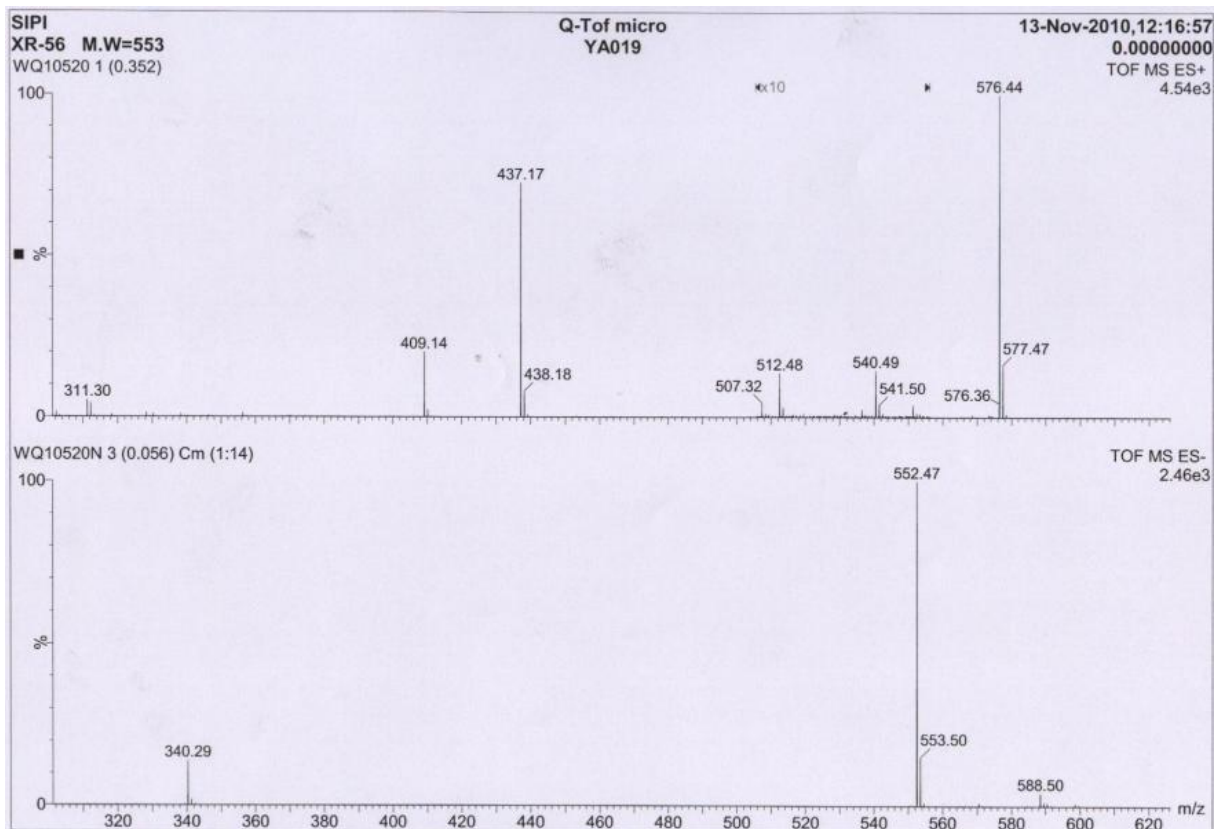



Figure S37. ESI-MS (positive and negative) fragments spectrum of compound 5.

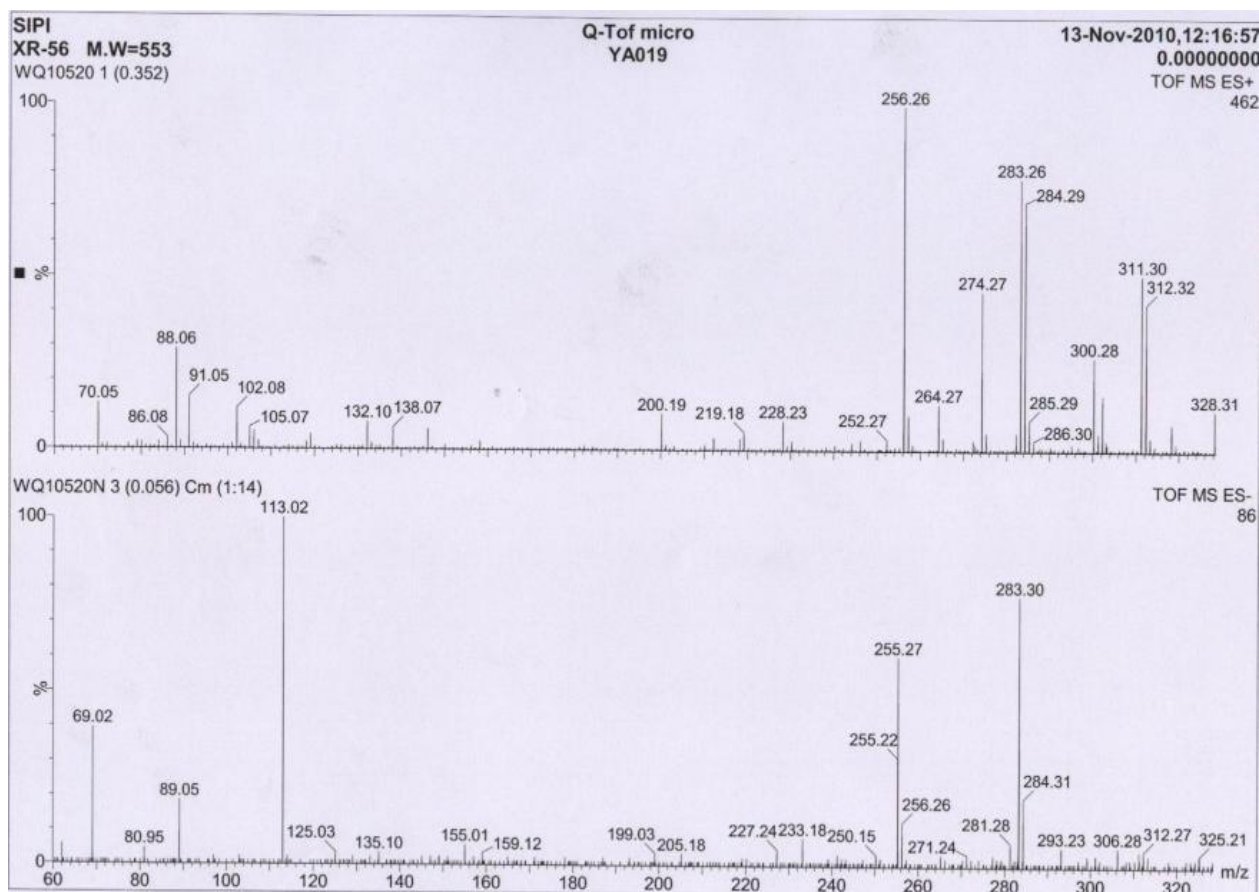Figure S38. <sup>1</sup>H-NMR spectrum of compound 5.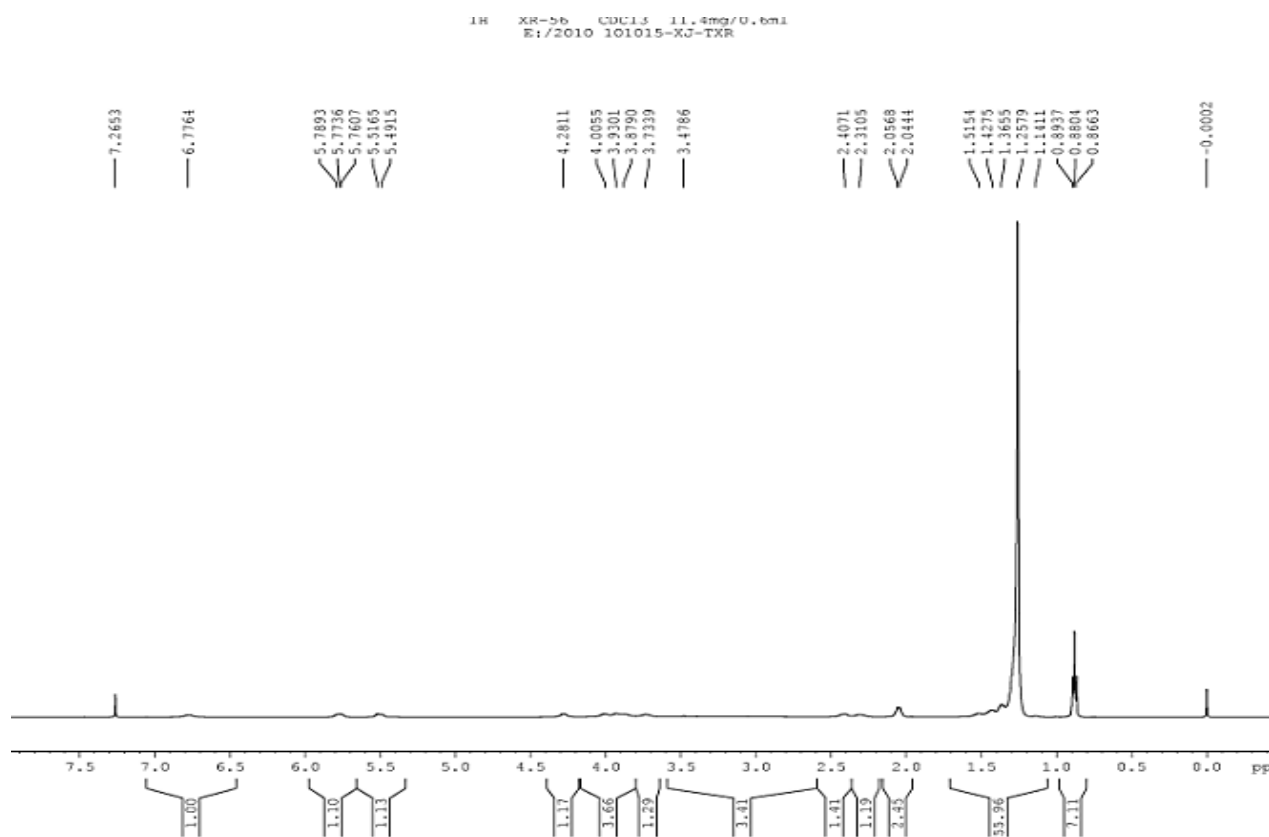



**Figure S39.**  $^{13}\text{C}$ -NMR spectrum of compound 5.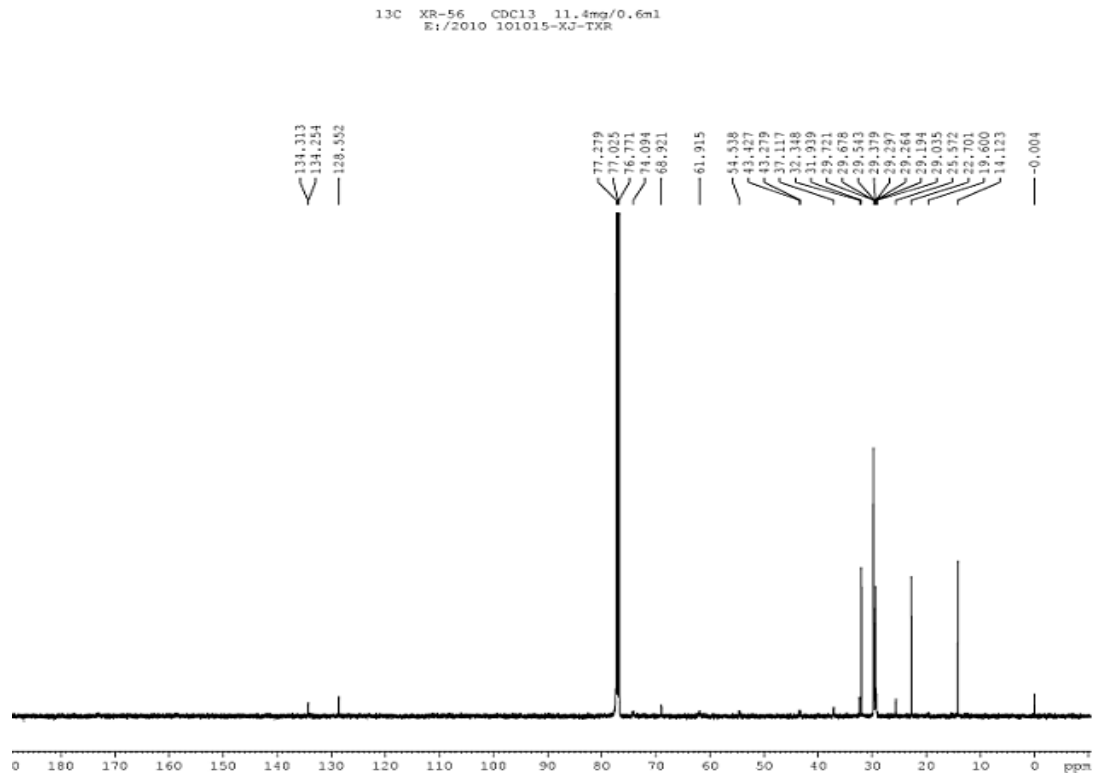**Figure S40.** DEPT spectrum of compound 5.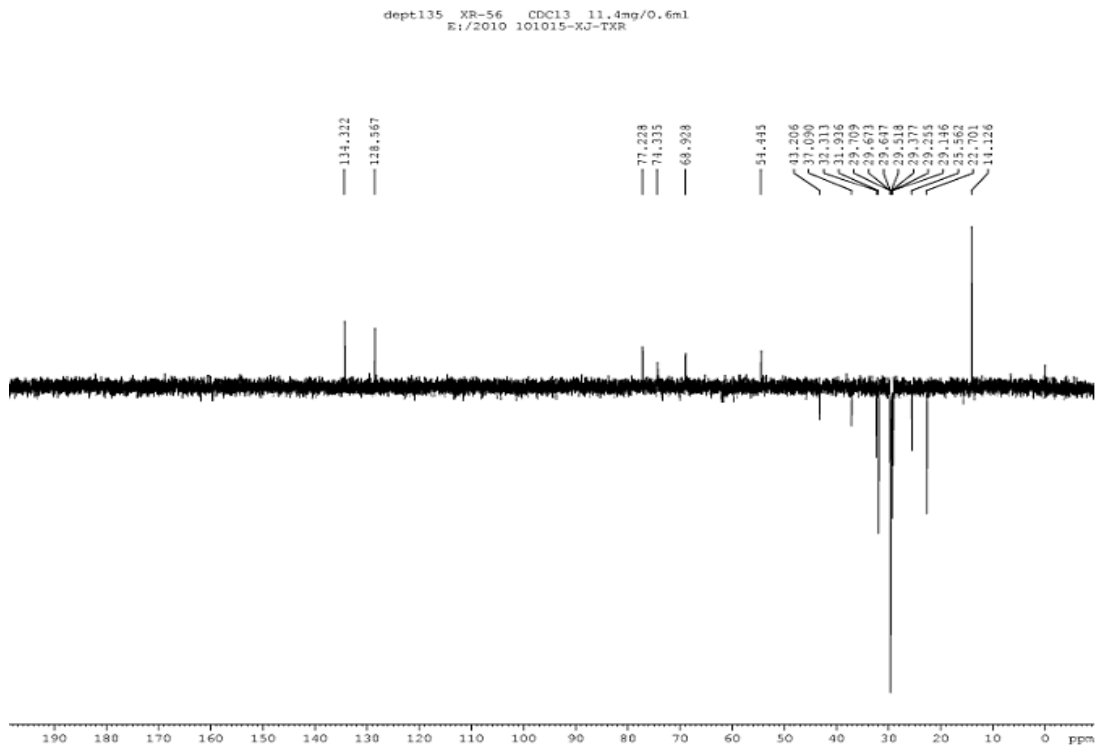

Supplement: marinedrugs-12-01987-s001.pdf [file marinedrugs-12-01987-s001.pdf]
